Watada et al.

1 **Age-dependent ribosomal DNA variations and their effect on**  
2 **cellular function in mammalian cells**

3 (Short title: Age-dependent ribosomal DNA variations)

4

5

6 **<sup>1,2</sup>Eriko Watada, <sup>4</sup>Sihan Li, <sup>1</sup>Yutaro Hori, <sup>1</sup>Katsunori Fujiki, <sup>1,3</sup>Katsuhiko**  
7 **Shirahige, <sup>4</sup>Toshifumi Inada, and <sup>1,2,3,5</sup>Takehiko Kobayashi**

8

9 <sup>1</sup>Institute for Quantitative Biosciences (IQB), <sup>2</sup>Department of Biological Sciences, University of  
10 Tokyo 1-1-1 Yayoi, Bunkyo-ku, Tokyo 113-0032, JAPAN

11 <sup>3</sup>Collaborative Research Institute for Innovative Microbiology, University of Tokyo, 1-1-1  
12 Yayoi, Bunkyo-ku, Tokyo 113-0032, JAPAN

13 <sup>4</sup>From the Graduate School of Pharmaceutical Sciences, Tohoku University, Sendai 980-8578,  
14 JAPAN

15

16

17 <sup>5</sup>Corresponding author:

18 Tel: +81-3-5841-7861

19 Fax: +81-3-5841-8472

20 [tako2015@iam.u-tokyo.ac.jp](mailto:tako2015@iam.u-tokyo.ac.jp) (T.K.)

21 <http://lafula-com.info/kobayashiken/CytoGen/>

22

23 Key words: ribosomal RNA gene (rDNA), rDNA copy number, DNA methylation,  
24 senescence, genome instability, mouse, mutation rate, yeast lifespan

25

26 This manuscript contains 8 figs, one table and supplemental information (4 figs and 2  
27 tables).

28

Watada et al.

## 1 **Abstract**

2 The ribosomal RNA gene, which consists of tandem repetitive arrays (rDNA repeat), is  
3 one of the most unstable regions in the genome. The rDNA repeat in the budding yeast  
4 is known to become unstable as the cell ages. However, it is unclear how the rDNA  
5 repeat changes in ageing mammalian cells. Using quantitative analyses, we identified  
6 age-dependent alterations in rDNA copy number and levels of methylation in mice. The  
7 degree of methylation and copy number of rDNA from bone marrow cells of 2-year-old  
8 mice were increased by comparison to 4-week-old mice in two mouse strains,  
9 BALB/cA and C57BL/6. Moreover, the level of pre-rRNA transcripts was reduced in  
10 older BALB/cA mice. We also identified many sequence variations among the repeats  
11 with two mutations being unique to old mice. These sequences were conserved in  
12 budding yeast and equivalent mutations shortened the yeast chronological lifespan. Our  
13 findings suggest that rDNA is also fragile in mammalian cells and alterations within this  
14 region have a profound effect on cellular function.

15

## 16 **Author Summary**

17 The ribosomal RNA gene (rDNA) is one of the most unstable regions in the genome  
18 due to its tandem repetitive structure. rDNA copy number in the budding yeast increases  
19 and becomes unstable as the cell ages. It is speculated that the rDNA produces an  
20 “aging signal” inducing senescence and death. However, it is unclear how the rDNA  
21 repeat changes during the aging process in mammalian cells. In this study, we attempted  
22 to identify the age-dependent alteration of rDNA in mice. Using quantitative single cell  
23 analysis, we show that rDNA copy number increases in old mice bone marrow cells. By  
24 contrast, the level of ribosomal RNA production was reduced because of increased  
25 levels of DNA methylation that represses transcription. We also identified many  
26 sequence variations in the rDNA. Among them, three mutations were unique to old  
27 mice and two of them were found in the conserved region in budding yeast. We then  
28 established a yeast strain with the old mouse-specific mutations and found this

Watada et al.

1 shortened the lifespan of the cells. These findings suggest that rDNA is also fragile in  
2 mammalian cells and alteration to this region of the genome affects cellular senescence.

3

#### 4 **Introduction**

5

6 The genome, which comprises the complete set of genetic information in an organism,  
7 is sensitive to damage from environmental factors such as exposure to ultraviolet  
8 radiation. Damage to the genome is efficiently repaired by a highly organized repair  
9 system (1)(2). Nonetheless, some damage is not properly repaired leading to mutations,  
10 which may include rearrangements such as deletions and amplifications. In addition,  
11 mutations can also arise from errors introduced during DNA replication. These  
12 mutations accumulate during successive cell divisions to induce cellular senescence.  
13 However, the underlying mechanism linking accumulation of mutations to senescence  
14 is not well understood.

15

16 Damage to DNA tends to accumulate at fragile sites in the genome (3). In the budding  
17 yeast, *Saccharomyces cerevisiae*, the ribosomal RNA gene (rDNA) is known to be a  
18 fragile site that is related to cellular senescence (4). Eukaryotic rDNA is made up of  
19 repetitive tandem arrays, which in the case of the budding yeast comprises ~150 rDNA  
20 copies located on chromosome XII. However, copies of these repeats are readily lost by  
21 homologous recombination. Because the cell requires a huge number of ribosomes,  
22 accounting for ~60% of total cellular protein, a gene amplification system is needed to  
23 compensate for these losses. As a result, rDNA copy number frequently varies leading  
24 to an unstable genomic region (for review, see (5)). In terms of rDNA gene  
25 amplification in budding yeast, the replication fork blocking protein Fob1 works as a  
26 recombination inducer (6). Fob1 associates with the replication fork barrier (RFB) site,  
27 inhibiting the replication process and inducing a DNA double-strand break that triggers  
28 gene amplification/recombination (7)(8)(9).

Watada et al.

1  
2 Intriguingly, *fob1* mutants have a stable rDNA copy number, and lifespan is extended  
3 by ~60% compared to the wild-type strain (10)(11). An important factor in suppressing  
4 rDNA copy-number change is Sir2, an NAD<sup>+</sup>-dependent protein deacetylase that is  
5 conserved across all kingdoms of life. Interestingly, *sir2* mutants of *S. cerevisiae*  
6 display increased unequal sister chromatid recombination, and the rDNA copy number  
7 frequently changes (7)(12). Moreover, the lifespan of the *sir2* mutant is shortened to  
8 approximately half that of the wild-type strain (13)(14). Taken together, these  
9 observations suggest that rDNA instability (i.e. frequent copy number alteration) is  
10 related to senescence (15).

11  
12 In mammals, the rDNA structure is similar to that of yeast. However, the intergenic  
13 spacer sequence (IGS) in mammalian cells is larger than in yeast (Figure 1A) and is an  
14 unstable region of the genome (16). The connection between aging and rDNA has been  
15 suggested in several studies of tissues from dog, mouse and human (17)(18)  
16 (19)(20)(21). Werner syndrome is a human premature aging disease. The rDNA of cells  
17 derived from patients with Werner syndrome display an increased level of noncanonical  
18 arrangements (22). In the hematopoietic stem cells of mice, replication stress  
19 accumulates in the rDNA and cellular functional activity declines with age (23).  
20 However, there is still a paucity of observations how rDNA changes during senescence.

21  
22 Here, we compared the genome of young and old mice, and identified differences in  
23 rDNA stability, methylation and transcription status. We also identified two mutations  
24 in rDNA that are specific to old mice. Moreover, these sequences are conserved in  
25 budding yeast rDNA. Interestingly, equivalent mutations in the budding yeast rDNA  
26 shortened their chronological lifespan. These findings suggest that the rDNA is also  
27 fragile in a mammalian cell and mutation of these sites affects cellular function.

28

Watada et al.

## 1 **Results**

2

### 3 **rDNA copy number is increased in older mice**

4 Because the rDNA copy number readily changes, each cell may have a different copy  
5 number. Therefore, we initially measured the rDNA copy number in a single cell by  
6 quantitative real-time PCR (qPCR). In this strategy, we determined rDNA copy number  
7 of RPE1 (Human Retinal Pigment Epithelial cell) to obtain a standard curve by Droplet  
8 Digital PCR (ddPCR, BIORAD). In brief, a fixed amount of RPE1 DNA was digested  
9 into small fragments, diluted and fractionated into droplets. The dilution factor ensured  
10 that each droplet contains just one DNA fragment. Each droplet was then subjected to  
11 PCR and the number of positive droplets with an rDNA fragment counted. The ratio of  
12 the number of positive to negative droplets gives the absolute copy number of rDNA.  
13 Using this method, RPE1 cells were found to have 330 rDNA copies (See Materials &  
14 Methods for detail). The RPE1 DNA was then used as a control in determining the  
15 mouse rDNA copy number in a single cell by qPCR. Initially, we ensured the accuracy  
16 of the assay using one and two bone marrow cells, and one, two and four RPE1 cells to  
17 measure the rDNA copy number by qPCR. As anticipated, the rDNA copy number  
18 increased linearly with cell number (Figure S1).

19

20 Bone marrow cells were isolated from young (four-week old) and old (two-year old)  
21 BALB/cA and C57BL/6 mice. Specifically, four young and five old BALB/cA mice  
22 (males), and four young (two males, two females) and four old (two males and two  
23 females) C57BL/6 mice were tested. The cells were separated into a 96-well plate using  
24 a FACS machine and subjected to qPCR to determine the rDNA copy number. The  
25 results are shown in Figure 1B. We first noticed that the average rDNA copy numbers  
26 (dotted lines) are quite different in these two strains. In the young mice, they were 471  
27 (BALB/cA ) and 1,025 (C57BL/6) per cell, that is, C57BL/6 has more than double. The  
28 ratio (1,025/471) was 2.18. To confirm the difference, we also estimated rDNA copy

Watada et al.

1 number using publicly available whole genome sequencing data in NCBI. As shown in  
2 Figure S2, three mice data in each strain were analyzed and their average copy numbers  
3 were determined as 642 (BALB/cA) and 1,412 (C57BL/6) per cell. The ratio  
4 (1,412/642) was 2.20. Therefore, we think the difference of rDNA copy number in the  
5 two strains in our single cell analysis is reasonable and the analysis works well.

6  
7 In terms of aging effect on the rDNA copy number, in both mouse strains, the average  
8 was increased in the older mice. We also calculated the coefficient of variation  
9 (S.D./mean) in individual cells, which indicates the rate of copy number variation in  
10 each mouse cell normalized by the average. The values obtained for the old mice were  
11 smaller than those for the young mice (see Discussion). These findings indicate that  
12 rDNA copy number increases in most old mice cells while the copy number variation  
13 decreases.

14  
15 We also tested the copy number alteration in old mice by Southern blot analysis. In this  
16 assay, DNA was isolated from mouse bone marrow cells and double digested with  
17 BamHI/NdeI restriction endonucleases before being subjected to agarose gel  
18 electrophoresis (Figure 2). The probe for the Southern blot was designed to recognize  
19 the 28S rRNA gene in the 4 kb BamHI-NdeI restricted fragment. However, some of the  
20 rDNA copies had a second BamHI site (BamHI-2) in the 4 kb fragment (Figure 2A),  
21 resulting in the detection of two bands (Figure 2B, top). For BALB/cA, the upper bands  
22 (4 kb) appear stronger than the lower bands in the old mice, suggesting a relative loss of  
23 BamHI-2 sites within rDNA. To normalize the results, a single copy gene (SWI5) was  
24 also detected using a specific probe (Figure 2B, middle). The intensities of the bands  
25 were measured, and the values plotted (Figure. 2B, bottom). This analysis showed the  
26 intensity of the 4 kb BamHI - NdeI fragment for BALB/cA mice increased relative to  
27 the other fragments. Taken together, the data showed the rDNA copy number tended to

Watada et al.

1 increase with age although the difference was not as marked as in the qPCR analysis  
2 (See Discussion).

3

#### 4 **rDNA transcription levels are decreased in the older mice**

5

6 The previous qPCR and Southern analysis showed the copy number of the rDNA  
7 tended to increase in older mice. We therefore speculated that the increased copy  
8 number of rDNA might result in an elevated level of rDNA transcripts (rRNA). To test  
9 this hypothesis, RNA was isolated using cells derived from young and old mice and the  
10 level of 28S rRNA measured by RT qPCR. The values were normalized against the  
11 transcripts of three housekeeping genes, Actb (actin, beta), B2M (beta-2 microglobulin),  
12 and GAPDH (glyceraldehyde-3-phosphate dehydrogenase). The results are shown in  
13 Figure 3B. Although there was a tendency for the young mice cells to have more 28S  
14 rRNA, the difference was not significant except for the results normalized against B2M.  
15 It is possible that the housekeeping genes are also affected by age. In addition, most of  
16 the 28S rRNA are thought to be included in the ribosomes that abundantly accumulate  
17 in the cell. Therefore, we measured newly synthesized pre-matured 45S rRNA using a  
18 probe that recognizes the promoter region and then calculated the ratio of matured to  
19 pre-matured rRNA. As shown in Figure 3C, in BALB/c, the newly synthesized rRNA  
20 ratio was reduced in the old mice. However, this difference was not as obvious in the  
21 C57BL/6 mice.

22

23 Transcription inactivation of rRNA gene in C57BL/6 mice was confirmed using the  
24 psoralen crosslinking method (24). Psoralen intercalates into non-nucleosomal rDNA  
25 copies that are actively transcribed more efficiently than those that are transcriptionally  
26 inactive. Therefore, using this method, we can estimate the proportion of active rDNA  
27 copies. Cells are treated with psoralen, UV crosslinked and the DNA isolated. After  
28 digestion with AflIII the DNA was subjected to agarose gel electrophoresis. The results

Watada et al.

1 are shown in Figure 4. The upper and lower bands correspond to transcribed (active)  
2 and non-transcribed (inactive) rDNA copies, respectively (Figure 4B). Band intensities  
3 were measured, and the values plotted (Figure 4C). The ratio of active to non-active  
4 rDNA was less in the old cells than in the young cells. These findings suggest that  
5 rDNA transcription is reduced in the older mice.

6

### 7 **rDNA is more highly methylated in the older mice**

8

9 Transcription is known to be affected by DNA methylation (25). Recently, it was  
10 reported that the methylation rate of rDNA increases in an age-dependent manner in  
11 both mouse and human (26). Therefore, we speculated that increased methylation of  
12 rDNA might reduce the transcription level in older mice. To test this hypothesis, DNA  
13 from the old and young mice was digested using a methylation sensitive enzyme SacII  
14 and the restriction pattern analyzed (27). As shown in Figure 5B, in the absence of  
15 SacII, two bands (4.0 and 2.4 kb, highlighted by arrowheads) were observed after  
16 BamHI-NdeI digestion (refer to Figure 2B). However, after SacII digestion most of  
17 these bands disappeared in the young mice. By contrast, the same analysis of DNA from  
18 old mice showed faint bands were still detectable (Figure 5B). The signal intensities of  
19 undigested and digested bands were measured, and the ratios calculated. As a loading  
20 control, a single gene SWI5 was also detected. The values of signal intensity were then  
21 plotted (Figure 5B, lower panel). The ratios of methylation in the old mice were  
22 increased except for the #2\* mouse. The same assay was performed in C57BL/6 strain  
23 and similar results were obtained (Figure 5C). These results confirmed that rDNA in the  
24 old mice is more methylated than in the young mice. Taken together, our findings  
25 suggest DNA methylation causes the reduced level of transcription of rDNA.

26

### 27 **There is sequence variation in rDNA of young and old mice**

28



Watada et al.

1 Finally, we determined the rDNA sequence in the young and old mice. Bone marrow  
2 cells, including hematopoietic stem cells that produce leukocytes, erythrocytes and  
3 platelets, are known to divide frequently. Thus, we speculated that mutations in the  
4 older mice cells accumulate and affect the function of the ribosome causing aging  
5 phenomena, such as slow growth and reduced viability. DNA from young and old mice  
6 was isolated and the 18S, 5.8S and 28S genes PCR amplified for analysis by deep  
7 sequencing. All of the reads were aligned and compared with the mouse reference  
8 sequences (28) to identify mutation sites. The results are shown in Figure 6A-C. The  
9 “mutation rate” is the ratio of mutations identified in the sequences to the total reads.  
10 Thus, a “mutation rate of 1 (100%)” means the sequence is different from the reference  
11 sequence. If the mutation rate is 0.5 (50%), half of the rDNA copies display a variation  
12 at that site. As a control, we also analyzed a housekeeping gene ATP5b (ATP synthase  
13 gene) (Figure 6D).

14

15 As shown in Figure 6, the overlapping black and yellow marks indicate the mutation  
16 rates in the young and old mice cells were similar. The average mutation rates in both  
17 young and old mice cells were similar (Figure S3 and S4E). Thus, any age-dependent  
18 alteration of rDNA sequence was not immediately apparent. Nonetheless, the average  
19 mutation rate of 28S rDNA (BA:0.00341, BL:0.00321) was higher than that of 18S  
20 rDNA (0.00236, 0.00222) and much higher than ATP5b and 5.8S (0.00054~0.00066).  
21 Indeed, sequence variation among copies of 28S rDNA has been reported previously  
22 (29). All of the high rate variations in 28S and 18S rDNA were found in DNA from  
23 both young and old mice (Figure 6).

24

25 For the purpose of identifying old mice-specific mutations, we searched for variations  
26 with a mutation rate of  $>0.0028$  (0.28%), which was equivalent to the maximum value  
27 for the control gene (ATP5b). The threshold value is the maximum apparent artificial  
28 mutation rate caused by PCR amplification or other errors. Within this range, we

Watada et al.

1 identified three old mice-specific mutations in the old BALB/cA strain (Table 1). By  
2 contrast, no old mice-specific mutations were identified in the C57BL/6 strain. Indeed,  
3 no old mice-specific variations were found after increasing the number of mice that  
4 were sequenced (Figure S4).

5  
6 Accuracy of the sequencing data was verified by analyzing variation of the BamHI  
7 recognition sequence that was detected in Figure 2 and Figure 5. The anticipated  
8 variation in the sequencing data corresponding to the BamHI site (GGATCC) in both  
9 mouse strains was observed together with the changes seen in the old BALB/cA mice  
10 (0.25 to 0.685) (Table S1). Thus, the sequencing data correlate with the Southern  
11 analysis in which the intensities of the upper bands increased in the old BALB/cA mice  
12 (Figure 2B).

#### 13 14 **The old mouse-specific mutations of rDNA affect yeast ribosomal function**

15  
16 To analyze the relationship between rDNA variation and function, we summed up the  
17 mutation rates in 20 bp windows and plotted the values (Figure 7). In the graph, several  
18 variations, or “hotspots”, were identified over the 28S rDNA. Interestingly, most of the  
19 hotspots (highlighted in yellow) were located in the non-conserved regions between  
20 mouse and budding yeast rDNA (red line, top). These observations suggest that most of  
21 the variations are present in the non-functional region of the 28S rRNA gene.

22  
23 We also mapped the positions of the three old mouse-specific mutations identified in  
24 the BALB/cA mice to yeast 25S rDNA. Interestingly, two sites (3291 and 4614) were  
25 plotted in the conserved region between mouse and yeast, suggesting they might be  
26 located in the functional domains in the rRNA. One approach to study the consequence  
27 of these mutations is to examine their impact in yeast. Thus, we generated budding  
28 yeast strains carrying the corresponding mutations in the 25S rDNA. For specific

Watada et al.

1 expression of the mutated rDNA, we used a yeast strain without rDNA in the  
2 chromosome (*rdn $\Delta\Delta$*  strain) (30). The strain initially carried a helper rDNA plasmid,  
3 which was then shuffled with plasmids containing mutations in the 25S region. The  
4 plasmid-borne mutated rDNA thus became the sole source of rRNA. Strains with either  
5 plasmid-derived wild-type rDNA, A2131G (mouse A3291G), or A3295G (mouse  
6 A4614G) mutated rDNA showed comparable cell growth in both solid and liquid  
7 medium. To test the relationship between these mutations and senescence, we measured  
8 the chronological lifespan by calculating survival rates every two days after the cells  
9 entered the stationary phase. As shown in Figure 8, one of the mutations (A3295G)  
10 lowered the proportion of surviving cells at all time points from day 5 onwards,  
11 indicating a shortened chronological lifespan. By contrast, another mutant (A2131G)  
12 showed similar survival rates to that of the wild-type yeast until day 15, but then the  
13 rate dropped on day 17. These observations suggest that although both mutations  
14 identified in the old mouse rDNA support cell growth in yeast, they may be harmful  
15 during chronological aging, particularly A3295G (mouse A4614G).

16

## 17 **Discussion**

18

19 The rDNA has the following unique features that make it possible to monitor age-  
20 dependent alterations in the genome. Firstly, because rDNA is a highly repetitive and  
21 recombinogenic region it is easy to assess instability by monitoring alterations in copy  
22 number. Secondly, as approximately half of the rDNA copies are not transcribed  
23 (24)(31), these repetitive non-transcribed regions are targets for both methylation (32)  
24 and mutation (33). Indeed, our analyses detected alterations in copy number and  
25 methylation level in old mice, as well as putative old mouse-specific mutations.

26

27 In terms of rDNA copy number alteration observed in old mice, the results from  
28 literature reports are contradictory (18). Copy number alteration itself is commonly

Watada et al.

1 observed by many researchers, but in some reports the number goes up and in others it  
2 goes down. Moreover, copy number alteration has also been observed in tissues (18).  
3 Some of these discrepancies may arise from problems related to hybridization during  
4 Southern blot analysis. The repetitive nature of the DNA combined with the high level  
5 of bound proteins from the nucleolus may affect the detection efficiency. Indeed, our  
6 results showed that although the rDNA copy number in old mice increased as detected  
7 by single cell analysis by qPCR, this increase was not obvious by Southern blot analysis  
8 in either of the two mouse strains (Figure 1 and Figure 2). For budding yeast, rDNA  
9 copies in the old cells dramatically increases (~10 times) as extra chromosomal rDNA  
10 circles (ERC) and their presence is a big burden on the cells because ERCs consume  
11 factors that are required for chromosome maintenance (34)(35). Therefore, the copious  
12 amount of ERC is thought to be a passive accelerator of cellular aging. In the case of  
13 mammals, this age-dependent increase of rDNA copies is not as dramatic (< 2 times,  
14 Figure 1). As such, the extra rDNA copies in mammals may not in itself reduce  
15 lifespan.

16  
17 In terms of genome instability, it may be possible to connect age-dependent changes in  
18 rDNA to the aging process. To address this issue, we previously established a strain of  
19 *S. cerevisiae* with reduced replication initiation activity only in the rDNA (36). Because  
20 ERC cannot replicate, there is no ERC accumulation. However, the lifespan of the strain  
21 was shortened, and rDNA stability was reduced in the strain. We speculated that  
22 extended travel of DNA polymerase, due to reduced replication initiation, induces DNA  
23 replication stress, such as fork arrest and damage, leading to genome instability. These  
24 findings suggested rDNA instability and/or damage itself is an aging signal that  
25 shortens lifespan (5). From this viewpoint, yeast and mammalian rDNA may play  
26 similar roles in terms of aging by acting as a large fragile site for disseminating an aging  
27 signal (5). Indeed, the replication fork blocking activity that causes rDNA  
28 recombination in the budding yeast is also present in mammalian rDNA (for a review

Watada et al.

1 see (37)(38)). A similar fork arrest induces rDNA instability to promote senescence by  
2 distributing the aging signal. Further studies are required to investigate this hypothesis.

3  
4 In the single cell analysis, we found that the copy number of rDNA increased and the  
5 variation decreased in older cells. As far as we are aware, there is no previous report  
6 showing alteration of rDNA copy number at the single cell level. One possible reason to  
7 explain the reduced variation phenotype in the old cells is that the number of stem cells  
8 for bone marrow goes down with age. Indeed, it is known that the number of  
9 the hematopoietic stem cells in the bone marrow gradually decreases during the process  
10 of aging (39). As bone marrow cells are produced from the stem cells, the variation of  
11 rDNA copies is reduced.

12  
13 The relationship between rDNA methylation and senescence has been discussed in  
14 previous reports (25)(26). The present results are consistent with these previous studies  
15 in showing that rDNA is more highly methylated in older mice (Figure 5). DNA  
16 methylation is known to repress transcriptional activity (25). Indeed, the ratio of 45S to  
17 28S transcripts reduced in the old BALB/cA mice. The underlying reason for the age-  
18 dependent increase in methylation has not been elucidated. However, repetitive non-  
19 coding elements, such as retrotransposons, are known targets for DNA methylation  
20 enzymes (32). In addition, rDNA is subject to DNA damage and has a high GC content,  
21 which are known to be related to age-dependent methylation (40)(41). Hence, a similar  
22 mechanism may recognize the repetitive rDNA as a target for methylation. Moreover, in  
23 terms of the relationship between reduced rDNA transcription and increased copy  
24 number in old cells, one possible explanation is that cells can compensate for lowering  
25 the production of rRNA by elevated copies of rDNA to enable them to survive. As a  
26 result, the rDNA copy number in the old mice is more than in the young mice.

27

Watada et al.

1 We anticipated more mutations in the older mice because there are many untranscribed  
2 non-canonical rDNA copies (22) and hematopoietic stem cells are subject to DNA  
3 replication stress (23). The untranscribed copies can accumulate mutations and  
4 replication stress increases DNA damage. However, the mutation rate in old mice was  
5 similar to that in young mice (Figure S3 and S4E). Therefore, cells should have an  
6 effective repair system and/or mechanism to avoid mutation accumulation such as gene  
7 conversion for homogenization (33). In this study, we identified three such mutations in  
8 the old mice. Although these mutations were present only in the old mice, it is not  
9 known whether they occurred during the aging process. Moreover, it is not known  
10 whether the rDNA copies with the mutation are actually transcribed or not. Thus, these  
11 mutations may not be related to senescence in the mice. Nonetheless, we found that two  
12 equivalent mutations in the budding yeast permitted cell growth, but one of the  
13 mutations (A3295G) apparently shortened the chronological lifespan. These findings  
14 indicate that the mutated rDNA, when present as the only source of rRNA, is  
15 transcribed and can support the essential functions of the ribosome, but viability during  
16 aging is negatively impacted, at least in yeast. Therefore, one could infer that if such  
17 harmful mutations accumulate in the rDNA repeats during the course of successive cell  
18 divisions, they may cause defects in the ribosomal and cellular functions to induce  
19 senescence.

20

21 In this study, we used two mice strains, BALB/cA and C57BL/6, for the analyses and  
22 they showed slightly different results. The rDNA copy number in C57BL/6 is twice as  
23 large as that in BALB/cA. Age-dependent alterations in the copy number, transcription  
24 and methylation levels were more prominent in BALB/cA. The mutation rate in  
25 BALB/cA was also higher than that in C57BL/6 and we were only able to identify  
26 specific mutations in older mice for the BALB/cA strain. These observations suggest  
27 that BALB/cA has a stronger aging phenotype than C57BL/6. Indeed, of the two mouse  
28 strains, BALB/cA is known to be more susceptible to carcinogens. Thus, BALB/cA

Watada et al.

1 may have a less efficient DNA repair system and a more unstable rDNA region,  
2 resulting in an enhanced level of senescence.

3

4

## 5 **Materials & Methods**

6

### 7 **Ethics statement**

8 All experiments were approved by the Animal Experiment Ethics Committees at the  
9 Institute of Molecular and Cellular Biosciences, University of Tokyo (Exp # 0210).  
10 Experiments were performed in precise accordance with the manual provided by the  
11 Life Science Research Ethics and Safety Committee, University of Tokyo.

12

### 13 **Mice**

14 Young mice (4 week-old, BALB/cAJc1 and C57BL/6JJc1) were purchased from CLEA  
15 Japan, Inc. (Tokyo, Japan) The old mice (approximately 2 year-old, BALB/cAJc1 and  
16 C57BL/6JJc1) were from this institute. For Figure S4, both the 8 week-old and 200  
17 week-old C57BL/6JJc1 mice were purchased from CLEA Japan, Inc.

18

### 19 **Determination of rDNA copy number in single cells**

20 Bone marrow cells ( $2 \times 10^7$ ) were isolated, washed three times with 5 ml PBS and then 1  
21 ml of 0.005% propidium iodide (PI) (P4864; Sigma-Aldrich, St Louis, MO) was added.  
22 Each cell was sorted using a high speed cell sorter (MoFlo XDR; BECKMAN  
23 COULTER, Brea, CA) into a 96-well plate with qPCR buffer [SYBR Premis Ex  
24 Taq™ (Tli RHaseH Plus)] (RR420A; TAKARA, Tokyo, Japan) with 0.4 uM primers  
25 (Table S2) and 0.24% Nonidet P-40 (Darmanis et al., 2017). For qPCR, the plate was  
26 applied to a Thermal Cycler Dice® Real Time System II (TP900; TAKARA) with the  
27 following amplification conditions; 98°C for 30 sec then 40 cycles of 95°C for 5 sec,  
28 60°C for 30 sec. The standard curve was generated by serial dilution of DNA from  
29 Human Retinal Pigment Epithelial cells (RPE1). The rDNA copy number of RPE1 was

Watada et al.

1 determined by Droplet Digital PCR (ddPCR). Briefly, 5 ng RPE1 DNA was digested  
2 with HpaII (NEB, Ipswich, MA), suspended in ddPCR mixture [ddPCR Supermix (No  
3 dUTP) (1863023; Bio-Rad, Hercules, CA), target primers/probe (FAM), reference  
4 primers/probe (VIC, TaqMan™ Copy Number Reference Assay, human, RNase P,  
5 4403326; ThermoFisher, Waltham, MA)] and applied to a X200™ Droplet Generator  
6 (1864002; Bio-Rad). Each droplet was collected into a 96-well plate [twin.tec semi-  
7 skirted 96-well plate, 951020362; Eppendorf, Enfield, CT] and detected by PCR using  
8 the following conditions; 95°C for 10 min followed by 40 cycles of 94°C for 30 sec,  
9 60°C for 1 min and then 98°C for 10 min. The signal was detected by a QX200™  
10 Droplet Reader and the number of positive droplets calculated using QuantaSoft™  
11 Software (1864003; Bio-Rad). On average a RPE1 cell had 330 rDNA copies.

12

### 13 **Southern blot analysis to detect rDNA**

14 For Southern blot analysis 150 ng of mouse DNA was digested with 10 units of BamHI-  
15 HF (NEB, Figure 2 and 5), NdeI (NEB, Figure 2 and 5) and SacII (NEB, Figure 5)  
16 overnight at 37°C. The digested DNA was resolved on a 0.8-1.0% agarose gel (in  
17 1xTAE) and blotted onto a filter. The 28S and SWI5 were detected on the same filter  
18 using PCR amplified probes with specific primers (Table S3). For the psoralen  
19 crosslinking assay, 2 x 10<sup>7</sup> bone marrow cells were suspended in 8 ml Opti-MEM® I  
20 Reduced Serum Medium (ThermoFisher) and divided into two 6 cm-diameter dishes. A  
21 200 µl solution of psoralen in methanol (200 µg/ml, Sigma-Aldrich) was added to each  
22 dish and only methanol to the control dish. Each of the dishes were placed on ice for 5  
23 min and crosslinked using UV-A for 4 min (7 cm apart from the UV light). This UV  
24 exposure and psoralen addition cycle was repeated four times. Cells were then scraped  
25 and collected by centrifugation (1,800 rpm, 5 min), and the DNA isolated. A 500 ng  
26 aliquot of DNA was digested with 20 units of AflIII (NEB) overnight at 37°C and  
27 subjected to Southern blot analysis (1% agarose gel in 1xTAE, 60 V, 18 hr). The gel



Watada et al.

1 was then exposed to UV (4000 J/cm<sup>2</sup> x 100) using a UV Stratalinker to reverse the  
2 crosslinking(42), (43), (44).

3

#### 4 **RT qPCR**

5 Bone marrow cells (1x10<sup>7</sup>) were washed with 5 ml PBS twice and the total RNA was  
6 isolated using a RNeasy Mini Kit (74104; Qiagen, Hilden, Germany). The solution was  
7 subsequently treated with DNase I (79254; Qiagen). The RNA was reverse transcribed  
8 to DNA by ReverTra Ace qPCR RT Master Mix (FSQ-201; TOYOBO, Tokyo, Japan)  
9 and the DNA solution (0.2 ng) was applied to qPCR using SYBR Premis Ex Taq<sup>TM</sup>  
10 (Tli RHaseH Plus) (RR420A; TAKARA). For normalization, housekeeping genes, Actb  
11 (actin, beta), GAPDH (glyceraldehyde-3-phosphate dehydrogenase) and B2M (beta-2  
12 microglobulin) were also examined. The sequences of the primers (0.4 μM each) are  
13 given in Table S2. The PCR conditions were as follows; 40 cycles of 95°C for 5 sec,  
14 60°C for 30 sec.

15

#### 16 **rDNA sequence analysis**

17 rDNA coding regions (18S, 5.8S and 28S) were amplified by PCR. The PCR mix  
18 included 20 ng of rDNA or 150 ng of ATP5b gene genomic DNA in a 40 ul reaction  
19 mixture (0.2 mM dNTPs, 1.5 mM MgSO<sub>4</sub>, 0.25 μM primers, 1× PCR Buffer for KOD-  
20 Plus-Neo, 0.8 U KOD-Plus-Neo). The sequences of the primers are listed in Table S2.  
21 The PCR cycle conditions were as follows for 18S rRNA: 94°C for 2 min, 25 cycles of  
22 98°C for 10 sec, 60°C for 30 sec, 68°C for 90 sec, then 68°C for 15 sec; for 5.8S rRNA:  
23 94°C for 2 min, 25 cycles of 98°C for 10 sec, 60°C for 30 sec, 68°C for 30 sec, then  
24 68°C for 15 sec; for 28S rRNA: 94°C for 2 min, 25 cycles of 98°C for 10 sec, 68°C for  
25 3 min, then 68°C for 15 sec; for ATP5b: 94°C for 2 min, 25 cycles of 98°C for 10 sec,  
26 68°C for 30 sec, then 68°C for 15 sec. The PCR products were purified by Nucleospin®  
27 Gel and PCR Clean-up (740609-250; TAKARA).

28

Watada et al.

1 Purified DNA was sonicated using a Covaris M220 instrument (Covaris, Woburn, MA)  
2 to 150-200 bp long fragments. The DNA was purified using a QIA quick PCR  
3 Purification kit (QIAGEN), and the library generated with a NEB Next Ultra II DNA  
4 Library Prep Kit for Illumina (NEB). The quality of the library was checked using an  
5 Agilent 2100 Bioanalyzer (Agilent High Sensitivity DNA kit). Sequencing was  
6 performed by HiSeq 2500 (Illumina, Hiseq SR Cluster kit v4, Hiseq SBS Kit v4, 50  
7 cycles). The sequence data was mapped on the reference sequence (GenBank  
8 BK000964) using Bowtie 2 (version 2.3.3.1), and the base frequency at each position  
9 was calculated to obtain the mutation rate (substitution, insertion and deletion) on a  
10 Galaxy platform (<https://usegalaxy.org/>). High-throughput sequencing data have been  
11 uploaded to NCBI Sequence Read Archive database under accession code  
12 PRJNA636244 (<https://www.ncbi.nlm.nih.gov/sra>).

13

#### 14 **Yeast strains**

15 Yeast strains expressing plasmid-borne rDNA with distinct mutations were constructed  
16 by plasmid shuffling. In brief, an rDNA depletion strain NOY986 (MATa ade2-1 ura3-1  
17 trp1-1 leu2-3,112 his3-11,15 can1-100 *rdnΔΔ::hisG* (30) carrying a high-copy-number  
18 rDNA/URA3+ plasmid was first transformed with a rDNA/LEU2+ plasmid containing  
19 mutation at A3295(mouse A4614) or A2131(mouse A3291) within the 25S region.  
20 Strains that had lost the former URA3+ plasmid were then positively selected on SC-  
21 LEU plates containing 5-FOA.

22

#### 23 **Yeast chronological lifespan analysis**

24 Yeast cells were streaked on a 2%-glucose YP plate from a glycerol stock and incubated  
25 at 30°C for 3 days. A single colony was grown at 30°C overnight in 2 ml SC medium  
26 containing 2% glucose, shaking at 200 rpm. The culture was diluted with fresh 2%-  
27 glucose SC medium to an optical density of 0.1 (OD<sub>600</sub> units) to give a day 0 culture of  
28 20 ml. Starting at day 3 and every 2 days, a 100 μl aliquot of the culture was removed  
29 and diluted with sterile water to prepare a 1:10,000 dilution. The dilution was spread  
30 onto a 2%-glucose YP plate and incubated at 30°C for 3 days. The number of colony-

Watada et al.

1 forming units (CFU) was scored and normalized with that of the day 3 culture to  
2 establish the survival rate. All experiments were performed in biological triplicates.

3

#### 4 **Acknowledgement**

5 We thank Drs Yusuke Yamazumi and Tetsu Akiyama for gifting old mice and for  
6 technical advice on how to isolate bone marrow cells. We thank Drs. Yufuko Akamatsu,  
7 Mariko Sasaki, Tetsushi Iida, Chihiro Horigome and all other members of the  
8 Laboratory of Genome Regeneration for helpful discussions. This research was  
9 supported by AMED under Grant Number JP20gm1110010 to TK and T.I., and in part  
10 by grants-in-aid for Scientific Research [17H01443 to T.K.] from the Japan Society for  
11 the Promotion of Science (JSPS).

12

#### 13 **References**

14

- 15 1. Sancar A, Lindsey-Boltz LA, Ünsal-Kaçmaz K, Linn S. Molecular mechanisms  
16 of mammalian DNA repair and the DNA damage checkpoints. *Annu Rev*  
17 *Biochem.* 2004;73(1):39–85.
- 18 2. Dana Branzei MF. Regulation of DNA Repair Throughout the Cell Cycle. *Nat*  
19 *Rev Mol Cell Biol* . 2008;4:297–308.
- 20 3. Durkin SG, Glover TW. Chromosome fragile sites. *Annu Rev Genet.*  
21 2007;41:169–92.
- 22 4. Kobayashi T. A new role of the rDNA and nucleolus in the nucleus - rDNA  
23 instability maintains genome integrity. Vol. 30, *BioEssays*. Wiley Online  
24 Library; 2008. p. 267–72.
- 25 5. Kobayashi T. Regulation of ribosomal RNA gene copy number and its role in  
26 modulating genome integrity and evolutionary adaptability in yeast. 68, *Cellular*  
27 *and Molecular Life Sciences*. Springer; 2011. p. 1395–403.
- 28 6. Kobayashi T. The Replication Fork Barrier Site Forms a Unique Structure with  
29 Fob1p and Inhibits the Replication Fork. *Mol Cell Biol.* 2003;23(24):9178–88.

Watada et al.

- 1 7. Kobayashi T, Horiuchi T, Tongaonkar P, Vu L, Nomura M. SIR2 regulates  
2 recombination between different rDNA repeats, but not recombination within  
3 individual rRNA genes in yeast. *Cell*. 2004;117(4):441–53.
- 4 8. Burkhalter MD, Sogo JM. rDNA enhancer affects replication initiation and  
5 mitotic recombination: Fob1 mediates nucleolytic processing independently of  
6 replication. *Mol Cell*. 2004;15(3):409–21.
- 7 9. Weitao T, Budd M, Hoopes LLM, Campbell JL. Dna2 helicase/nuclease causes  
8 replicative fork stalling and double-strand breaks in the ribosomal DNA of  
9 *Saccharomyces cerevisiae*. *J Biol Chem*. 2003;278(25):22513–22.
- 10 10. Defossez P-A, Prusty R, Kaeberlein M, Lin S-J, Ferrigno P, Silver PA, et al.  
11 Elimination of Replication Block Protein Fob1 Extends the Life Span of Yeast  
12 Mother Cells. *Mol Cell* [Internet]. 1999;3(4):447–55.
- 13 11. Takeuchi Y, Horiuchi T, Kobayashi T. Transcription-dependent recombination  
14 and the role of fork collision in yeast rDNA. *Genes Dev*. 2003;17(12):1497–506.
- 15 12. Kobayashi T, Ganley ARD. Recombination regulation by transcription-induced  
16 cohesin dissociation in rDNA repeats. *Science* (80- ). 2005;309(5740):1581–4.
- 17 13. Kaeberlein M, McVey M, Guarente L. The SIR2/3/4 complex and SIR2 alone  
18 promote longevity in *Saccharomyces cerevisiae* by two different mechanisms.  
19 *Genes Dev*. 1999;13(19):2570–80.
- 20 14. Saka K, Ide S, Ganley ARD, Kobayashi T. Cellular senescence in yeast is  
21 regulated by rDNA noncoding transcription. *Curr Biol*. 2013;23(18):1794–8.
- 22 15. Kobayashi T. Ribosomal RNA gene repeats, their stability and cellular  
23 senescence. Vol. 90, *Proceedings of the Japan Academy Series B: Physical and*  
24 *Biological Sciences*. The Japan Academy; 2014. p. 119–29.
- 25 16. Stults DM, Killen MW, Williamson EP, Hourigan JS, Vargas HD, Arnold SM, et  
26 al. Human rRNA gene clusters are recombinational hotspots in cancer. *Cancer*  
27 *Res*. 2009;69(23):9096–104.
- 28 17. Johnson R, Strehler BL. Loss of genes coding for ribosomal RNA in ageing brain  
29 cells. *Nature*. 1972;240(5381):412–4.
- 30 18. Gaubatz JW, Cutler RG. Age-related differences in the number of ribosomal rna  
31 genes of mouse tissues. *Gerontology*. 1978;24(3):179–207.

Watada et al.

- 1 19. Zafiropoulos A, Tsenteliero E, Linardakis M, Kafatos A, Spandidos DA.  
2 Preferential loss of 5S and 28S rDNA genes in human adipose tissue during  
3 ageing. *Int J Biochem Cell Biol.* 2005;37(2):409–15.
- 4 20. Strehler BL, Chang M, Johnson LK. Loss of hybridizable ribosomal DNA from  
5 human post-mitotic tissues during aging: I. Age-dependent loss in human  
6 myocardium. *Mech Ageing Dev.* 1979;11(5–6):371–8.
- 7 21. Strehler BL, Chang MP. Loss of hybridizable ribosomal DNA from human post-  
8 mitotic tissues during aging: II. Age-dependent loss in human cerebral cortex -  
9 Hippocampal and somatosensory cortex comparison. *Mech Ageing Dev.*  
10 1979;11(5–6):379–82.
- 11 22. Caburet S, Conti C, Schurra C, Lebofsky R, Edelstein SJ, Bensimon A. Human  
12 ribosomal RNA gene arrays display a broad range of palindromic structures.  
13 *Genome Res.* 2005;15(8):1079–85.
- 14 23. Flach J, Bakker ST, Mohrin M, Conroy PC, Pietras EM, Reynaud D, et al.  
15 Replication stress is a potent driver of functional decline in ageing  
16 haematopoietic stem cells. *Nature.* 2014;512(7513):198–202.
- 17 24. Dammann R, Lucchini R, Koller T, Sogo JM. Chromatin structures and  
18 transcription of rDNA in yeast *Saccharomyces cerevisiae*. *Nucleic Acids Res.*  
19 1993;21(10):2331–8.
- 20 25. D’Aquila P, Montesanto A, Mandalà M, Garasto S, Mari V, Corsonello A, et al.  
21 Methylation of the ribosomal RNA gene promoter is associated with aging and  
22 age-related decline. *Aging Cell.* 2017;16(5):966–75.
- 23 26. Wang M, Lemos B. Ribosomal DNA harbors an evolutionarily conserved clock  
24 of biological aging. *Genome Res.* 2019;29(3):325–33.
- 25 27. Nelson PS, Papas TS, Schweinfest CW. Restriction endonuclease cleavage of 5-  
26 methyl-deoxycytosine hemimethylated DNA at high enzyme-to-substrate ratios.  
27 *Nucleic Acids Res.* 1993;21(3):681–6.
- 28 28. Grozdanov P, Georgiev O, Karagyozov L. Complete sequence of the 45-kb  
29 mouse ribosomal DNA repeat: Analysis of the intergenic spacer. *Genomics.*  
30 2003;82(6):637–43.
- 31 29. Parks MM, Kurylo CM, Dass RA, Bojmar L, Lyden D, Vincent CT, et al.  
32 Variant ribosomal RNA alleles are conserved and exhibit tissue-specific  
33 expression. *Sci Adv.* 2018;4(2):eaao0665.

Watada et al.

- 1 30. Wai HH, Vu L, Oakes M, Nomura M. Complete deletion of yeast chromosomal  
2 rDNA repeats and integration of a new rDNA repeat: use of rDNA deletion  
3 strains for functional analysis of rDNA promoter elements in vivo. *Nucleic Acids*  
4 *Res.* 2000;28(18):3524–34.
- 5 31. French SL, Osheim YN, Cioci F, Nomura M, Beyer AL. In Exponentially  
6 Growing *Saccharomyces cerevisiae* Cells, rRNA Synthesis Is Determined by the  
7 Summed RNA Polymerase I Loading Rate Rather than by the Number of Active  
8 Genes. *Mol Cell Biol.* 2003;23(5):1558–68.
- 9 32. Beisel C, Paro R. Silencing chromatin: Comparing modes and mechanisms. Vol.  
10 12, *Nature Reviews Genetics*. Nature Publishing Group; 2011. p. 123–35.
- 11 33. Ganley ARD, Kobayashi T. Monitoring the rate and dynamics of concerted  
12 evolution in the ribosomal DNA repeats of *saccharomyces cerevisiae* using  
13 experimental evolution. *Mol Biol Evol.* 2011;28(10):2883–91.
- 14 34. Neurohr GE, Terry RL, Sandikci A, Zou K, Li H, Amon A. Deregulation of the  
15 G1/S-phase transition is the proximal cause of mortality in old yeast mother cells.  
16 *Genes Dev.* 2018;32(15–16):1075–84.
- 17 35. Morlot S, Song J, Léger-Silvestre I, Matifas A, Gadai O, Charvin G. Excessive  
18 rDNA Transcription Drives the Disruption in Nuclear Homeostasis during Entry  
19 into Senescence in Budding Yeast. *Cell Rep.* 2019;28(2):408-422.e4.
- 20 36. Ganley ARD, Ide S, Saka K, Kobayashi T. The Effect of Replication Initiation  
21 on Gene Amplification in the rDNA and Its Relationship to Aging. *Mol Cell.*  
22 2009;35(5):683–93.
- 23 37. Dalgaard JZ, Godfrey EL, MacFarlane RJ. Eukaryotic Replication Barriers:  
24 How. Why and Where Forks Stall. *DNA Replication-Current Adv.* 2011;269–  
25 304.
- 26 38. Akamatsu Y, Kobayashi T. The Human RNA Polymerase I Transcription  
27 Terminator Complex Acts as a Replication Fork Barrier That Coordinates the  
28 Progress of Replication with rRNA Transcription Activity. *Mol Cell Biol.*  
29 2015;35(10):1871–81.
- 30 39. Nijnik A, Woodbine L, Marchetti C, Dawson S, Lambe T, Liu C, et al. DNA  
31 repair is limiting for haematopoietic stem cells during ageing. *Nature.*  
32 2007;447(7145):686–90.

Watada et al.

- 1 40. Kirkwood TBL. Understanding the odd science of aging. Vol. 120, Cell.  
2 Elsevier; 2005. p. 437–47.
- 3 41. Fraga MF, Agrelo R, Esteller M. Cross-talk between aging and cancer: The  
4 epigenetic language. In: Annals of the New York Academy of Sciences. Wiley  
5 Online Library; 2007. p. 60–74.
- 6 42. Udugama M, Sanij E, Voon HPJ, Son J, Hii L, Henson JD, et al. Ribosomal  
7 DNA copy loss and repeat instability in ATRX-mutated cancers. Proc Natl Acad  
8 Sci U S A. 2018;115(18):4737–42.
- 9 43. Stefanovsky V, Moss T. Regulation of rRNA synthesis in human and mouse cells  
10 is not determined by changes in active gene count. Cell Cycle. 2006;5(7):735–9.
- 11 44. Conconi A, Widmer RM, Koller T, Sogo JM. Two different chromatin structures  
12 coexist in ribosomal RNA genes throughout the cell cycle. Cell. 1989;57(5):753–  
13 61.

## 15 **Figure legends**

### 17 **Figure 1. rDNA copy number and coefficient of variation in individual cells**

18 (A) Structure of rDNA in mouse. One unit of rDNA is ~43 kb, composed of the 45S  
19 pre-rRNA gene and intergenic spacer. 45S pre-rRNA is subsequently processed into  
20 three mature rRNAs (18S, 5.8S and 28S). (B) rDNA copy numbers were measured in  
21 young (4 week-old) and old (2 year-old) mice. (Upper) rDNA copy number in single  
22 cells were measured by qPCR and plotted. The copy number was determined using  
23 RPE1 as a standard (see Materials & Methods). The X-axis shows the identification  
24 numbers (ID#) of individual mice used to isolate the bone marrow cells. The dotted  
25 lines are the average values of the mice. The green dots are the average of two  
26 independent qPCR experiments from each mouse and the error bars indicate the range.  
27 (Lower) Plots of coefficient of variation (S.D. was divided by the average) for each  
28 mouse.

### 30 **Figure 2. Detection of relative rDNA copy number in old and young mice**



Watada et al.

1 (A) Position of the probe for Southern blot analysis in (BC) and recognition sites for  
2 BamHI and NdeI are shown. (BC) Detection of relative rDNA copy number. (Top  
3 panel) Southern analysis for rDNA copy number. DNA was digested with BamHI and  
4 NdeI. Upper bands (4 kb) come from rDNA units without BamHI-2 site and lower  
5 bands (2.4 kb) from rDNA units with BamHI-2 site. (Middle panel) Detection of SWI5  
6 gene as a loading control. A single copy gene SWI5 was detected on the same filter  
7 used in the upper panel. (Bottom panel) Relative amount of rDNA copy number. The  
8 band intensities of rDNA were normalized by those of SWI5 and the values are relative  
9 to the average of rDNA values in the four young mice. The blue dots show the results  
10 from the upper band intensities of rDNA and the red dots are the results from the lower  
11 bands. ID# is the identification number of individual mice that were used to isolate the  
12 bone marrow cells (Figure 1). p values are shown at the bottom of the panel. n.s. is “not  
13 significant”.

14

### 15 **Figure 3. rDNA transcripts in old and young bone marrow cells**

16 (A) Positions of the primer sets for qPCR to measure rDNA transcripts (pre 45S and  
17 28S rRNA). (B) Amount of 28S rRNA normalized by transcripts of the three  
18 housekeeping genes (GAPDH, B2M and Actb). The values are the average of four  
19 independent experiments and the error bars are S.D. The values are relative to those of  
20 young cells. p value is shown in case it is significant ( $p < 0.05$ ). (C) Ratio of the pre 45S  
21 rRNA to 28S rRNA. The values are the average of four independent experiments and  
22 the error bars are S.D. The values are relative to those of young cells. p value is shown.  
23 “n.s.” is “not significant”.

24

### 25 **Figure 4. Ratio of active and inactive rDNA copies in old and young cells**

26 Psoralen crosslinked rDNA was digested with AflIII and band retardation assessed after  
27 electrophoresis. (A) Recognition sites of AflIII and position of the probe for (B). (B)  
28 Southern blot analysis to detect the psoralen crosslinked rDNA by mobility retardation



Watada et al.

1 in young and old mice. Transcription “active” rDNA efficiently intercalates psoralen,  
2 which retards migration during gel electrophoresis. ID # is the identification number of  
3 the mice (same as Figure 2B). (C) Ratio of active to inactive rDNA copies. Band  
4 intensities of (B) were measured and the ratio of active to inactive rDNA calculated.  
5 The error bars are S.D. The p value is shown.

6

### 7 **Figure 5. rDNA methylation in old and young bone marrow cells**

8 rDNA methylation was detected by digestion with a methylation sensitive enzyme  
9 SacII. (A) Position of the probe for Southern blot analysis in (BC) and recognition sites  
10 for BamHI and SacII. (BC) Ratio of methylated rDNA copies in young and old mice.  
11 (Top panel) Southern analysis to detect the ratio of undigested band by SacII. The  
12 positions of undigested bands are indicated by arrowheads on the left-hand side of the  
13 panels. (Middle panel) Detection of the SWI5 gene as a loading control. A single copy  
14 gene SWI5 was detected on the same filter used in the upper panel. (Bottom panel)  
15 Analysis of rDNA that failed to digest with SacII. The signal intensities of the  
16 undigested rDNA (SacII+) and non-digested (SacII-) bands were measured and the  
17 ratios plotted. The black dots show the results for the lower bands (black arrowhead, in  
18 the Top panel) and the blue dots are for the upper bands (blue arrowhead in the Top  
19 panel). ID# is the identification number of individual mice that were used to isolate the  
20 bone marrow cells (same as Figure 2). p values are calculated from the average of  
21 young and old mice.

22

### 23 **Figure 6. rDNA sequence variation in young and old mice**

24 The rDNA sequences from two old and two young mice were determined and compared  
25 to the reference sequence. Mutation rates were then calculated at each nucleotide  
26 position. (A) 28S rRNA gene, (B) 18S rRNA gene (C) 5.8S rRNA gene and (D) ATP5b  
27 gene. Non-coding regions are not shadowed. Mutation rate is the difference from the  
28 reference sequence. Ave. is the average mutation rate.

Watada et al.

1

## 2 **Figure 7. Hotspot of variation in the 28S rDNA**

3 Mapping of hotspots of variation in mouse 28S. (Upper panel) Alignment of mouse 28S  
4 and budding yeast 25S rRNA genes. The gray boxes are conserved regions in the two  
5 species and the red lines are mouse unique regions. (Lower panel) Variation frequency  
6 in the 28S rRNA gene. The mutation rates were summed (more than 0.0028 was picked  
7 up, Figure 6A) every 20 bp and then plotted. Data from two mice were used in each  
8 graph. The yellow boxes represent mouse specific non-conserved regions.

9

## 10 **Figure 8. Chronological lifespan in budding yeast with mutated rDNA**

11 Two old mouse-specific mutations in the 28S rRNA gene were introduced into the  
12 budding yeast 25S rRNA gene and the chronological lifespans of the yeast measured.  
13 Lifespans in the yeast strains with A2131G (left panel) and A3295G mutations in the  
14 25S rRNA gene. The values are the average of nine experiments.

15

## 16 **Table 1. The positions of old mouse specific mutations in BALB/cA.**

17 The values refer to the mutation rates. Position 3094 is not conserved in yeast rDNA.

18

19

## 20 **Supporting information**

### 21 **Supporting figure and table legends**

22

### 23 **Figure S1. Accuracy in single cell analysis**

24 rDNA copy numbers of one, two and four cells were measured by qPCR. rDNA copy  
25 number in RPE1 determined by digital PCR was used as the standard (Materials &  
26 Methods). In all, 12 samples for RPE1 and 36 samples for bone marrow cells were  
27 tested (dots). The horizontal bars are the average and vertical bars are S.D. Left panel:  
28 RPE1 and right panel: mouse bone marrow cell.

29

Watada et al.

1 **Figure S2. Estimated rDNA copy number from database**

2 rDNA copy numbers of BALB/cA (BALB/c 1-3) and C57BL/6 (B6J 1-3) mice were  
3 estimated by reanalysis of publicly available whole genome sequencing data. rDNA  
4 copy number estimation by whole genome sequencing data were performed as follows.  
5 Fastq files obtained from NCBI SRA (PRJNA41995, PRJNA386034) were mapped  
6 against mouse whole genome and rDNA sequence using Bowtie2, and the fraction of  
7 rDNA reads among all mapped reads were used to calculate the copy numbers.

8

9 **Figure S3. Mutation rates of young and old mice rDNA**

10 Average mutation rates in the rDNA were calculated. (A) BALB/cA. young m3: young  
11 male 3, young f1: young female 1, old m3: old male 3, old m4: old male 4. The same  
12 mice were used for Figure 6. (B) C57BL/6. young m1; young male 1, young f1: young  
13 female 1, old m1: old male 1, old f1: old female 1. The same mice were used for Figure  
14 6. Mutation rates that are more than 0.9 were not used because they are different from  
15 the reference sequences.

16

17 **Figure S4. rDNA sequence variation in young and old C57BL/6 mice**

18 rDNA sequences from three old (old 1-old 3) and three young (young1-young3) mice  
19 (C57BL/6) were determined and compared to the reference sequence. The calculated  
20 mutation rates at each nucleotide position was determined as for Figure 6. (ABC) Old  
21 1-3 mice were compared with young 1 mouse. (A) 28S rRNA gene, (B) 18S rRNA gene  
22 and (C) 5.8S rRNA gene, (D) Three young mice and (E) Average of mutation rates.  
23 Non-coding regions are shadowed. Ave. is the average mutation rate. Mutation rate is  
24 the difference from the reference sequence as for Figure S3.

25

26 **Table S1. Sequence variation at BamHI recognition sequences in young and old**  
27 **mice.**

28 Mutation rates of BamHI sites in young and old BALB/cA mice. (Upper panel) original  
29 BamHI sequence and its mutated version. (Lower panel) Mutation rates of BamHI sites.  
30 Ave. is the average sum of the mutation rates.

31

Watada et al.

**1 Table S2. Primer list.**

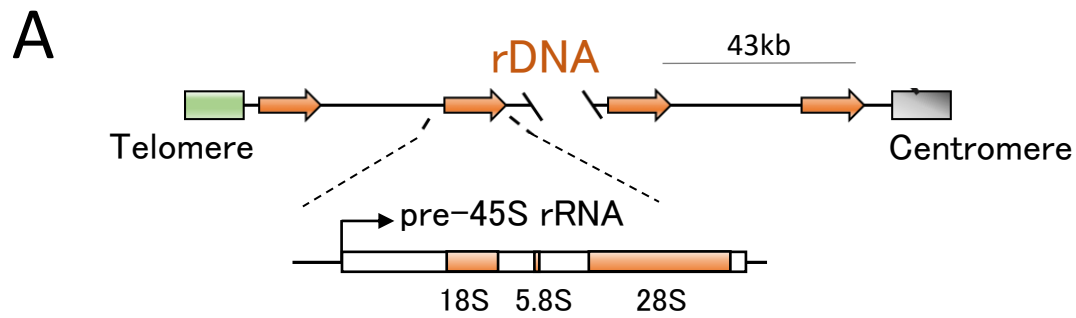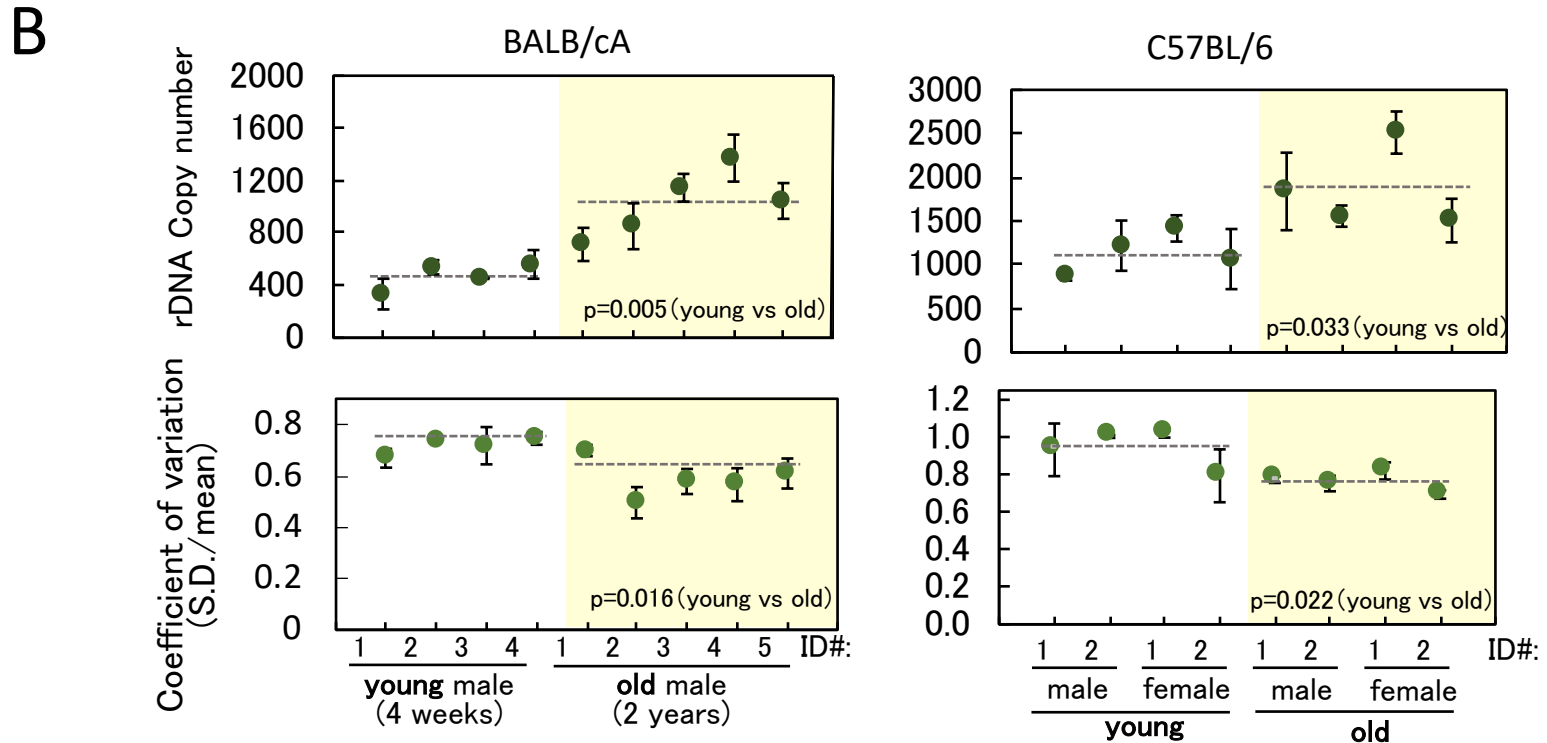

Fig.1 rDNA copy number and coefficient of variation in individual cells

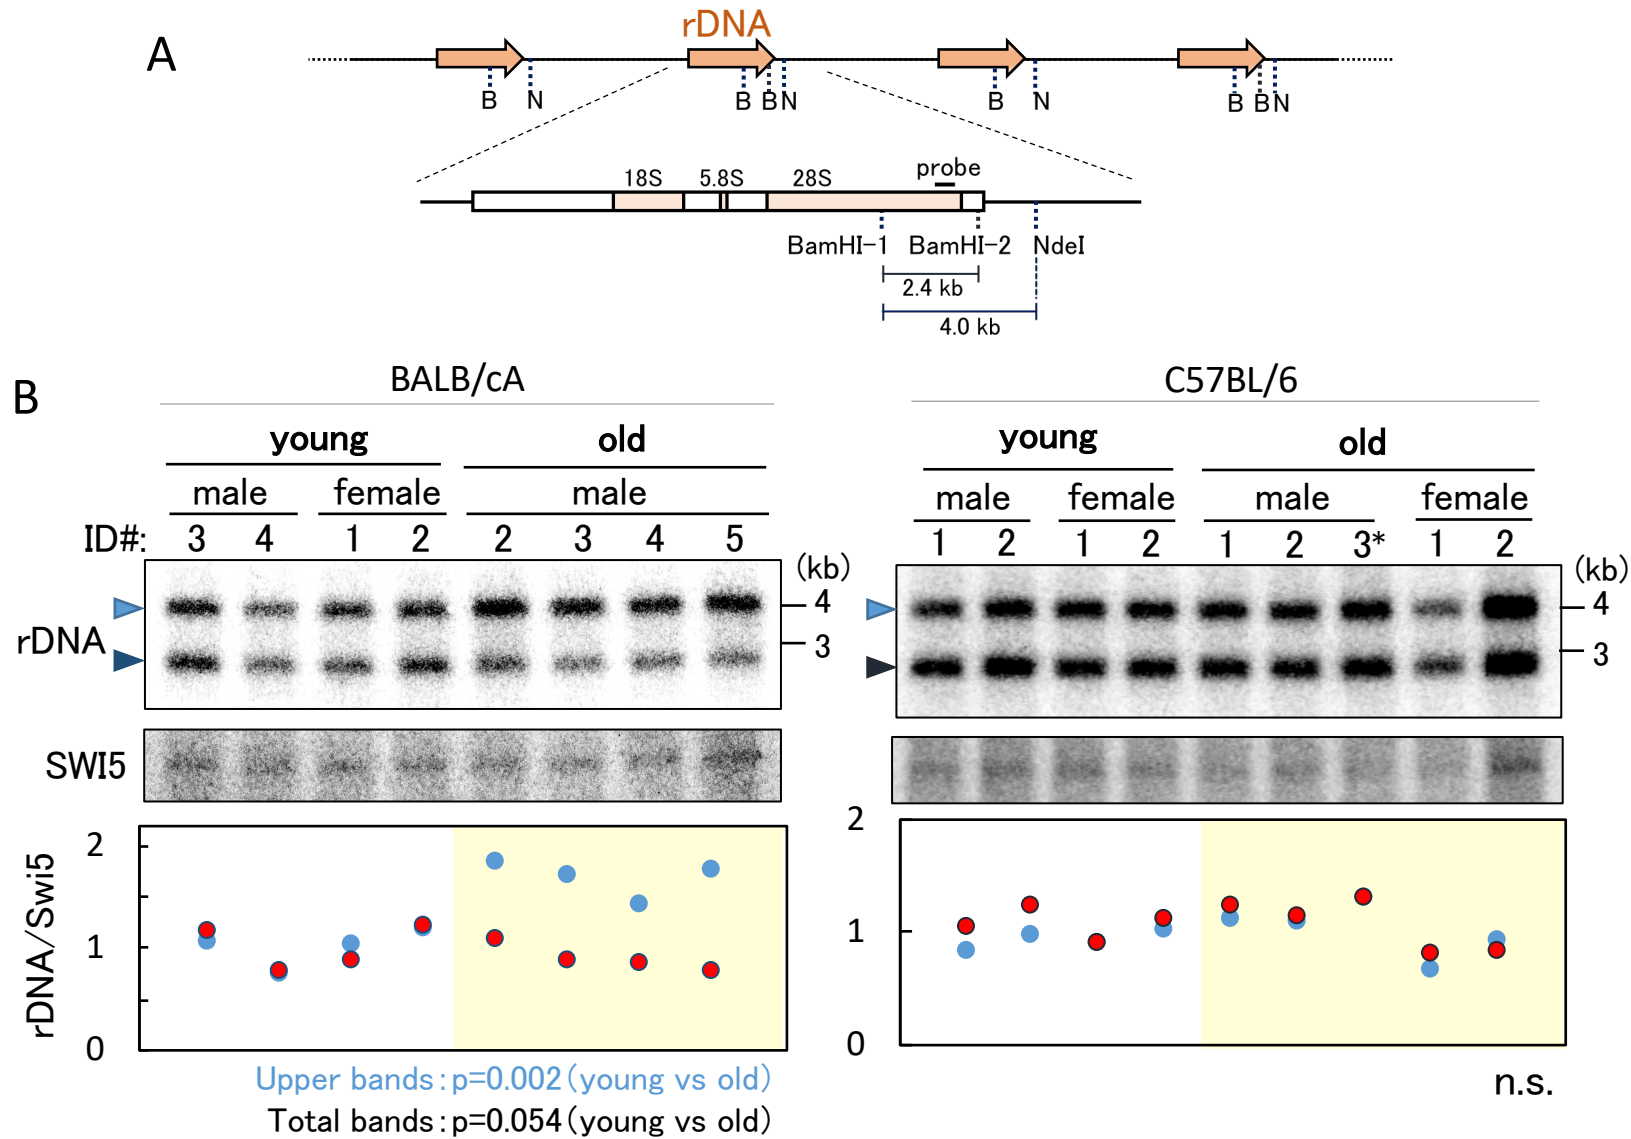

Fig.2 Detection of relative rDNA copy number in old and young mice

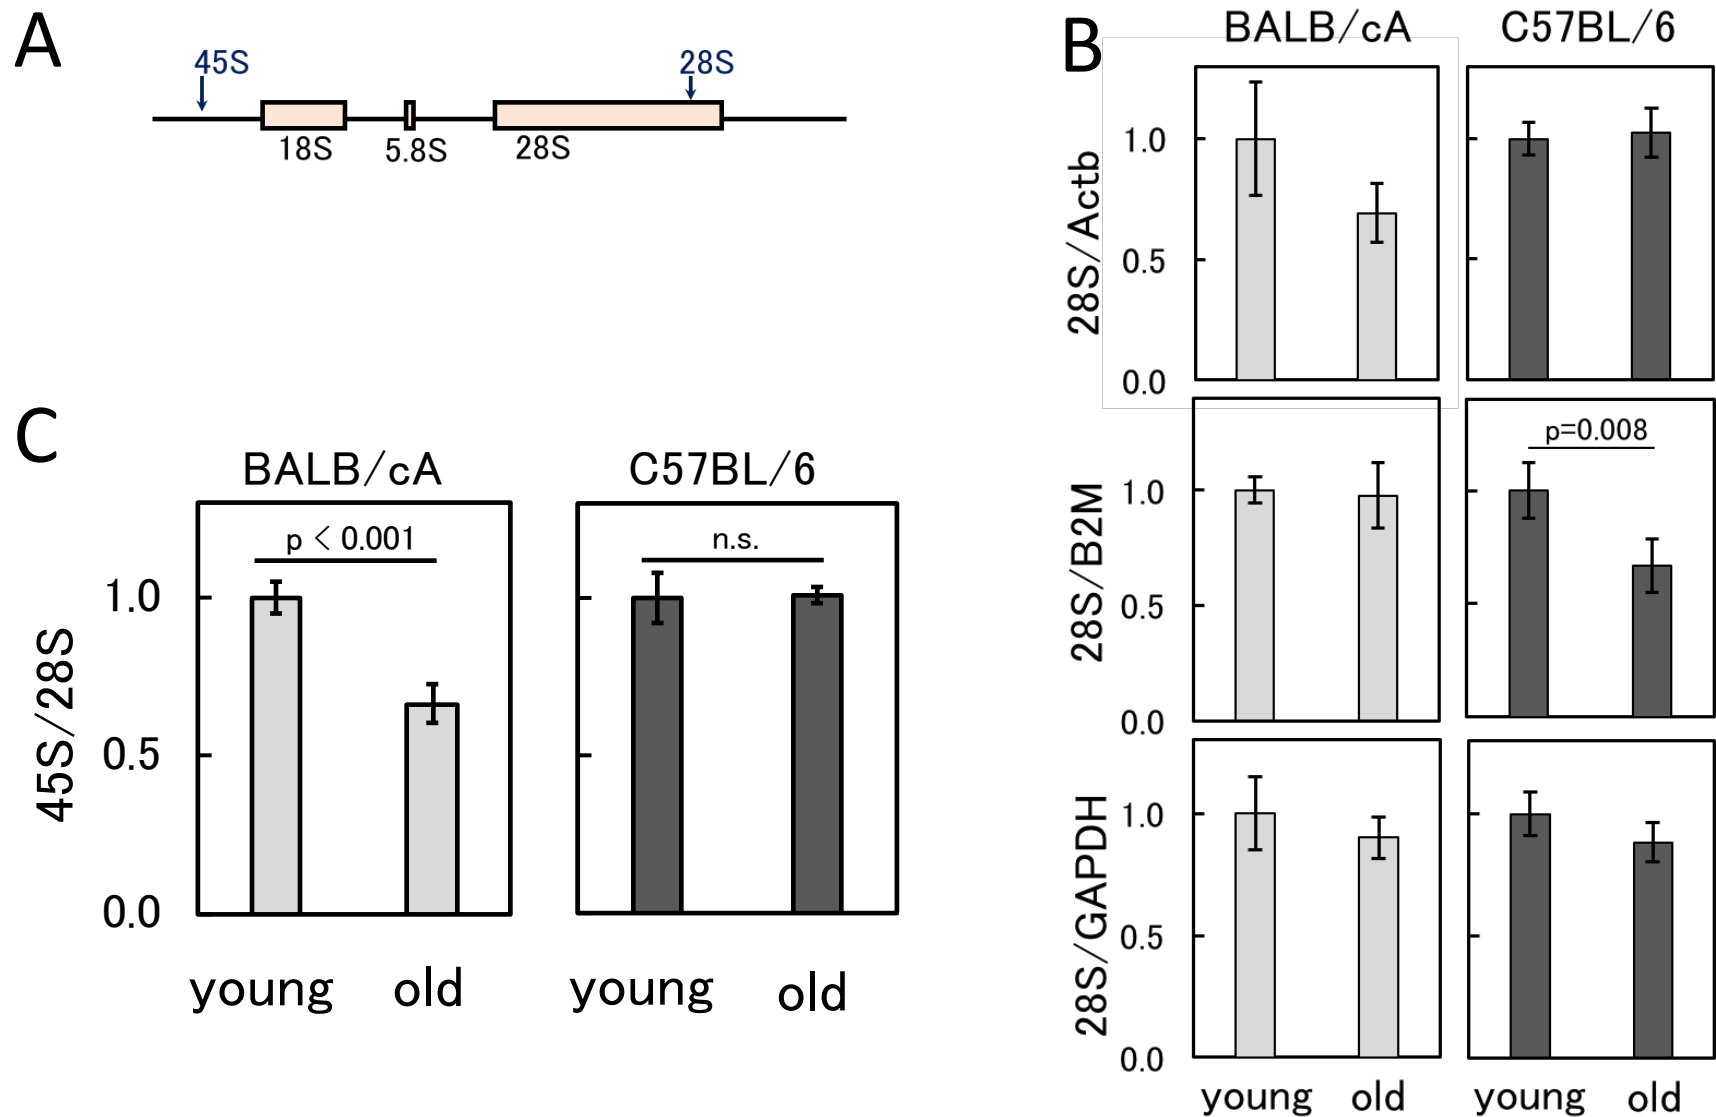

Fig.3 rDNA transcripts in old and young bone marrow cells

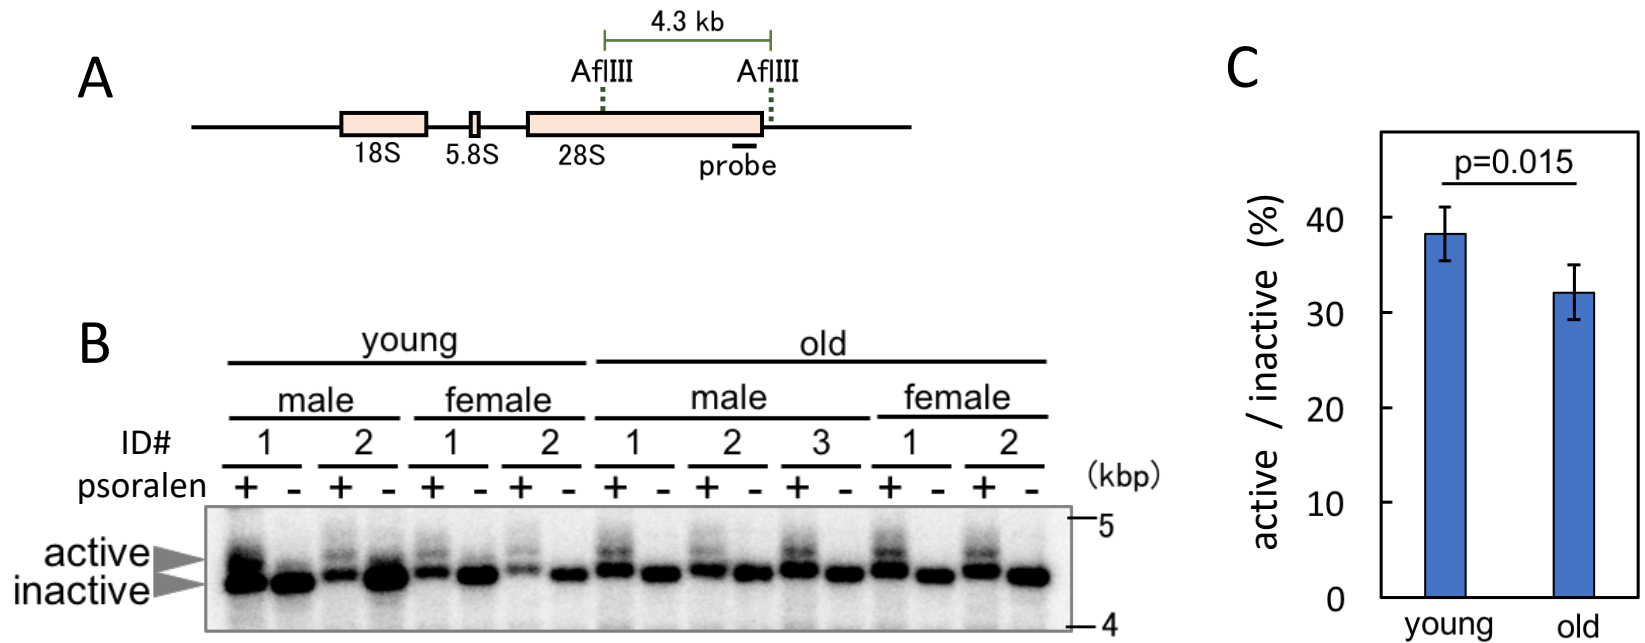

Fig.4 Ratio of active and inactive rDNA copies in old and young cells



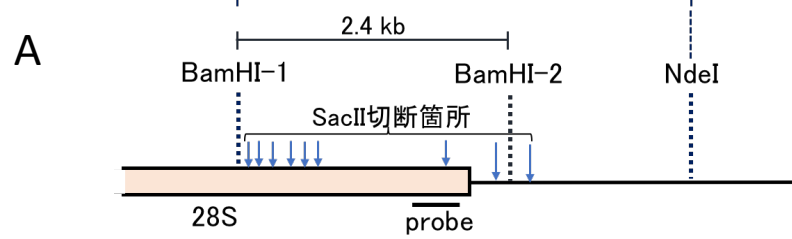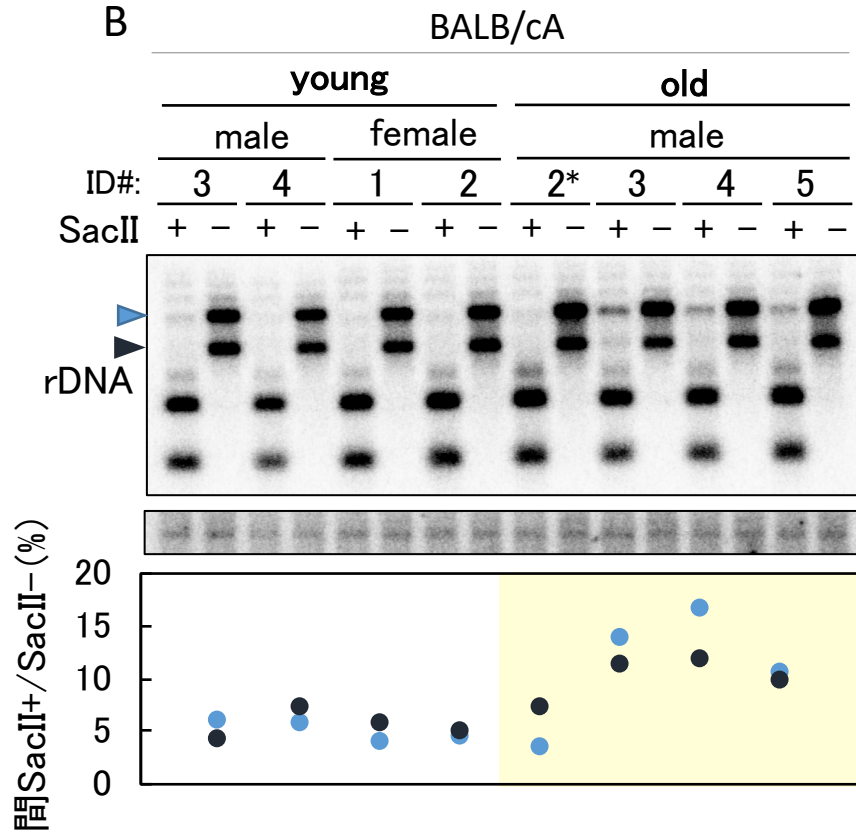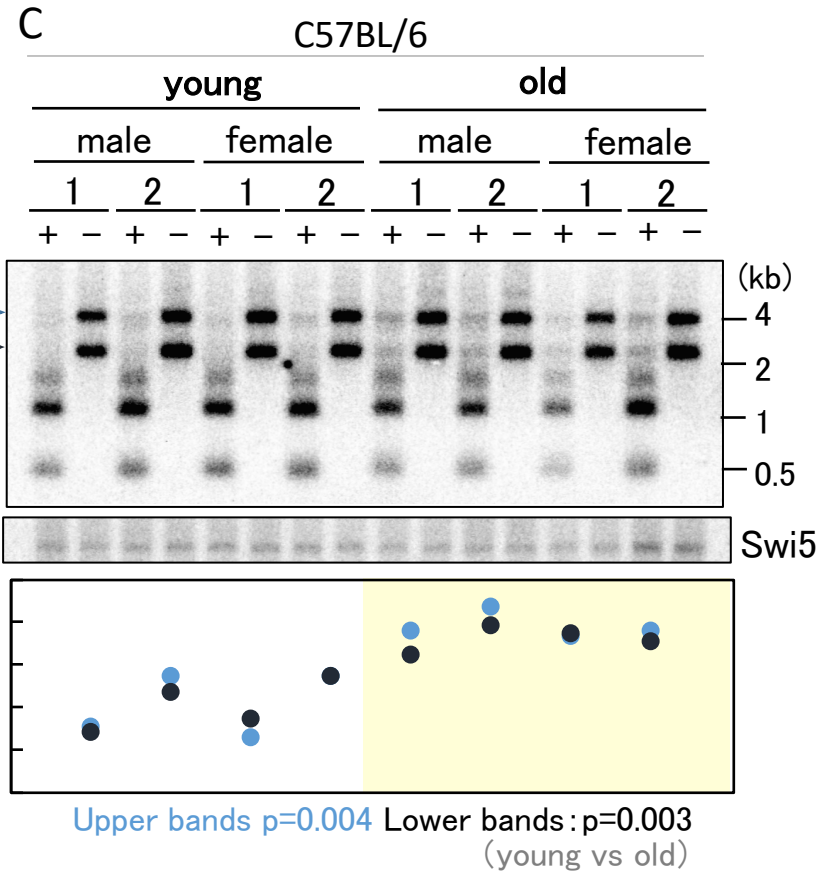

Fig.5 rDNA methylation in old and young bone marrow cells

## A 28S rRNA gene

BALB/cA (Ave. 0.00341)

◇ young male 3 □ young female 1 △ old male 3 × old male 4

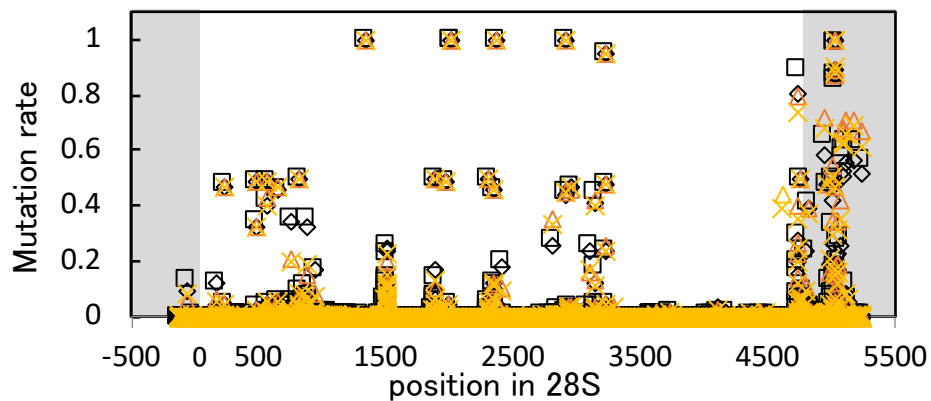

C57BL/6 (Ave. 0.00321)

◇ young male 1 □ young female 1 △ old male 1 × old female 1

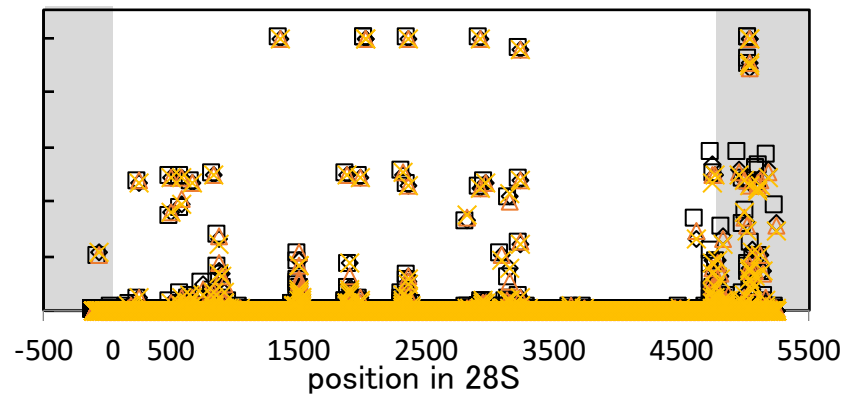

## B 18S rRNA gene

BALB/cA (Ave. 0.00236)

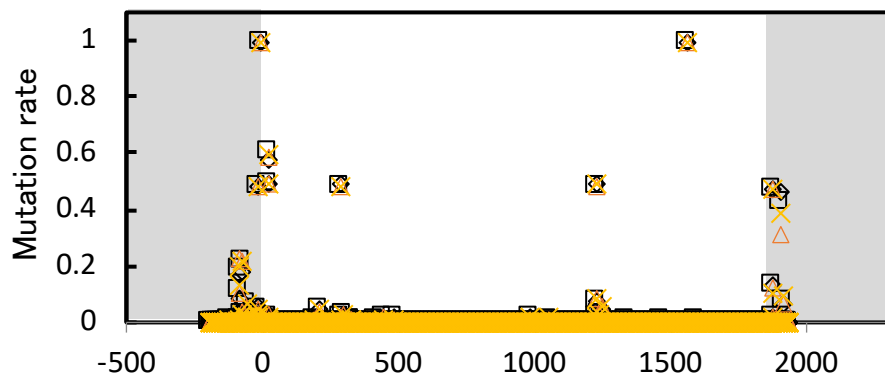

C57BL/6 (Ave. 0.00222)

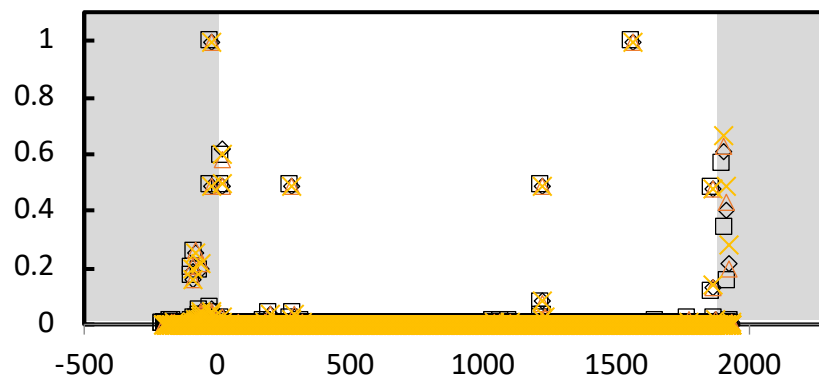

Fig.6 rDNA sequences variation in young and old mice

### C 5.8S rRNA

BALB/cA (Ave.0.00064)

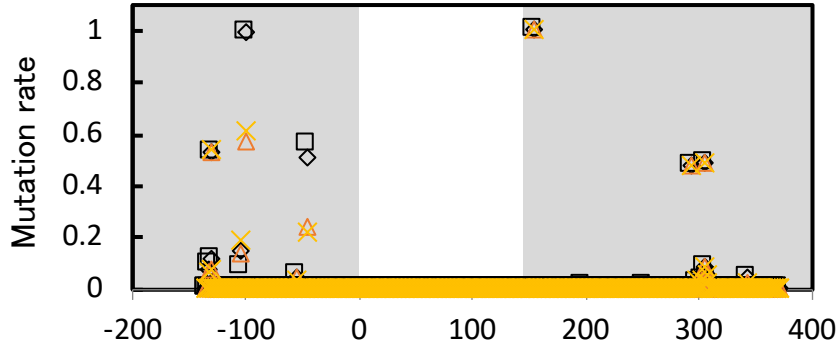

C57BL/6 (Ave. 0.00054)

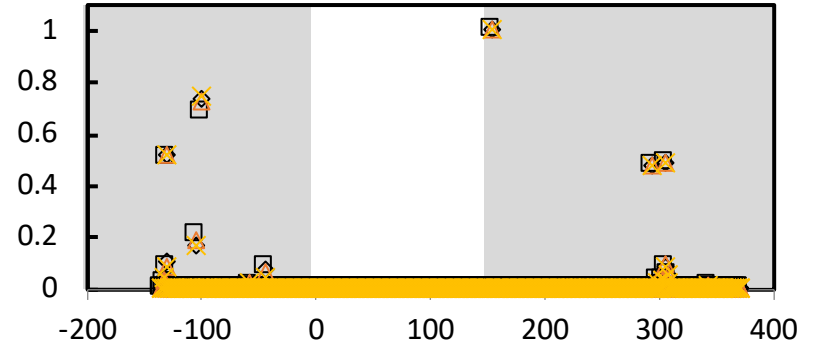

### D ATP5b

BALB/cA (Ave. 0.00066)

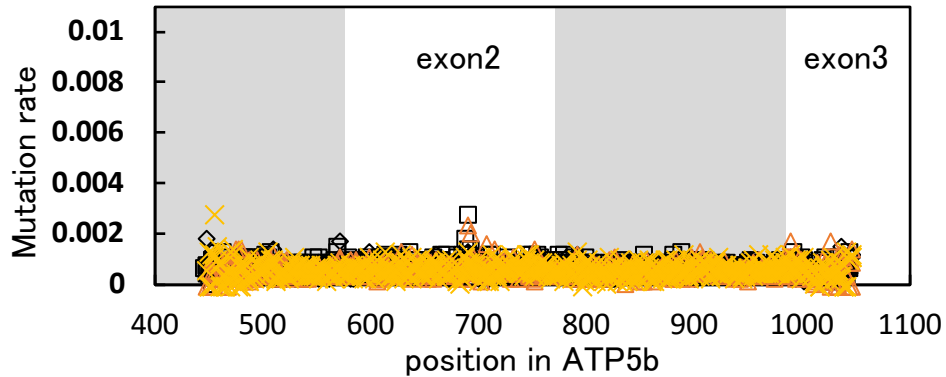

C57BL/6 (Ave. 0.00060)

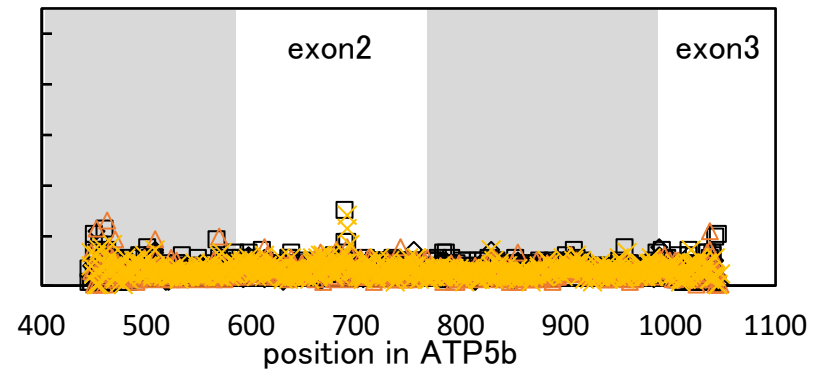

Fig.6 rDNA sequences variation in young and old mice

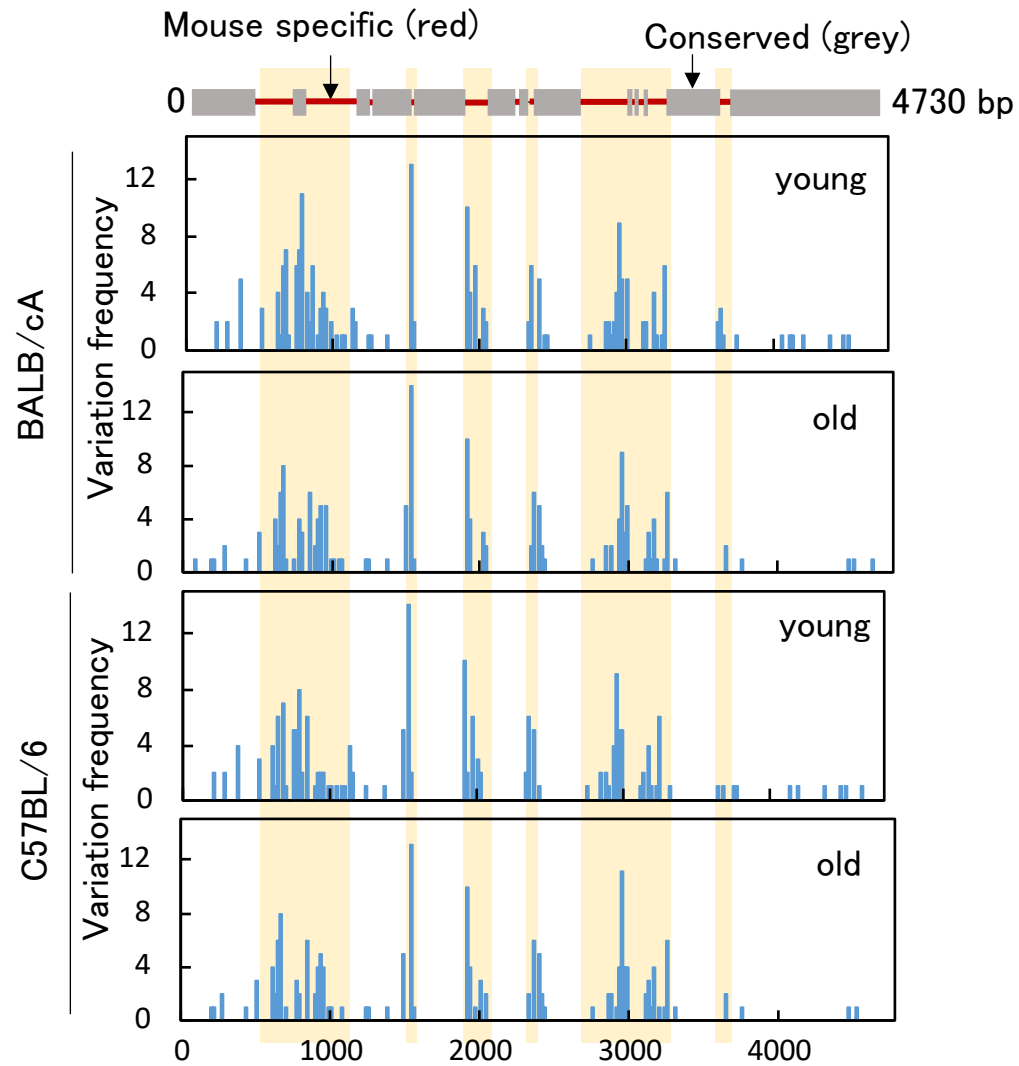

Figure 7 Hotspot of variation in the 28S rDNA

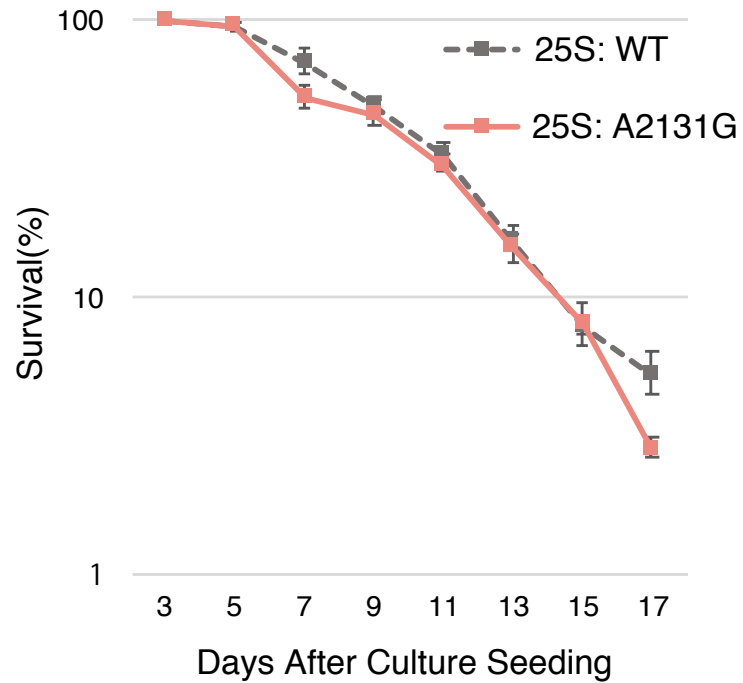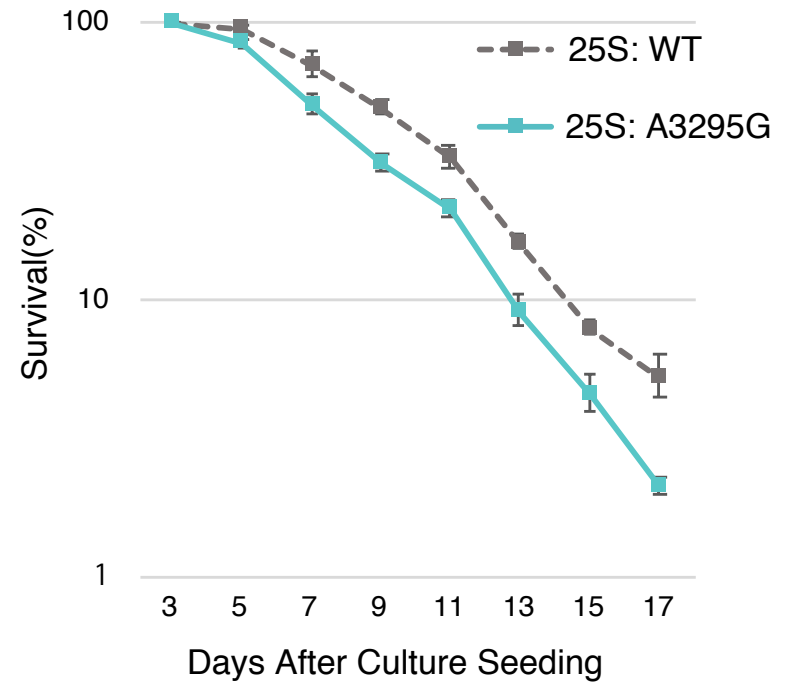

Fig.8 Chronological lifespan in budding yeast with mutated rDNA

Table 1 The positions of old mice specific mutations in BALB/cA

| positions<br>of mouse<br>28S | young   |           | young<br>ave. | old     |         | old ave.     | old -<br>young | positions<br>of yeast<br>25S |
|------------------------------|---------|-----------|---------------|---------|---------|--------------|----------------|------------------------------|
|                              | Male #3 | female #1 |               | male #3 | male #4 |              |                |                              |
| <b>4614</b>                  | 0.000   | 0.001     | <b>0.001</b>  | 0.441   | 0.396   | <b>0.419</b> | <b>0.418</b>   | 3295                         |
| <b>3291</b>                  | 0.001   | 0.001     | <b>0.001</b>  | 0.039   | 0.032   | <b>0.035</b> | <b>0.034</b>   | 2131                         |
| <b>3094</b>                  | 0.036   | 0.038     | <b>0.037</b>  | 0.009   | 0.007   | <b>0.008</b> | - 0.029        | -                            |

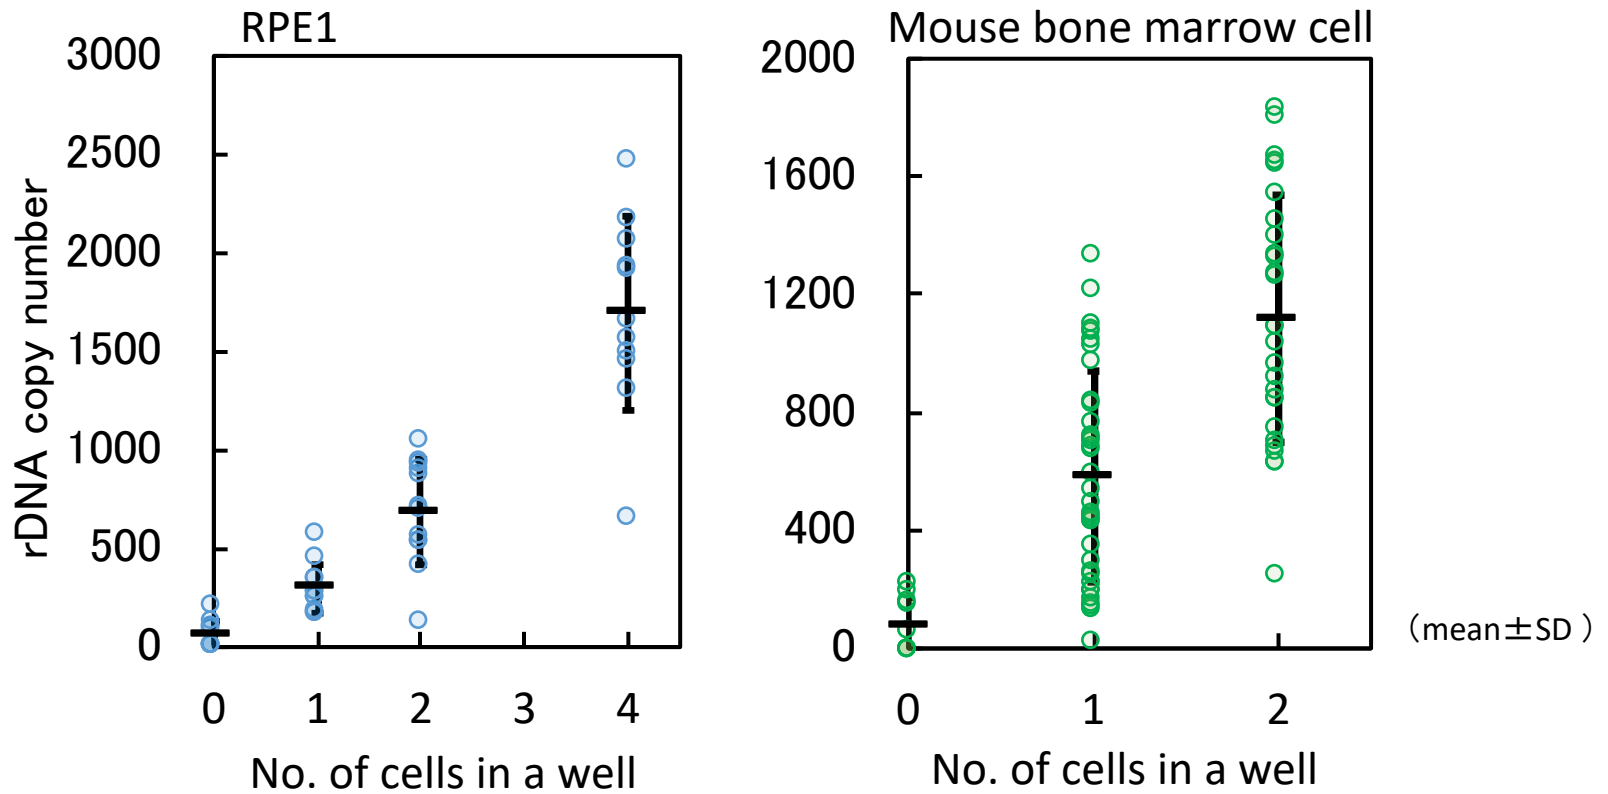

Figure S1 Accuracy in of single cell analysis

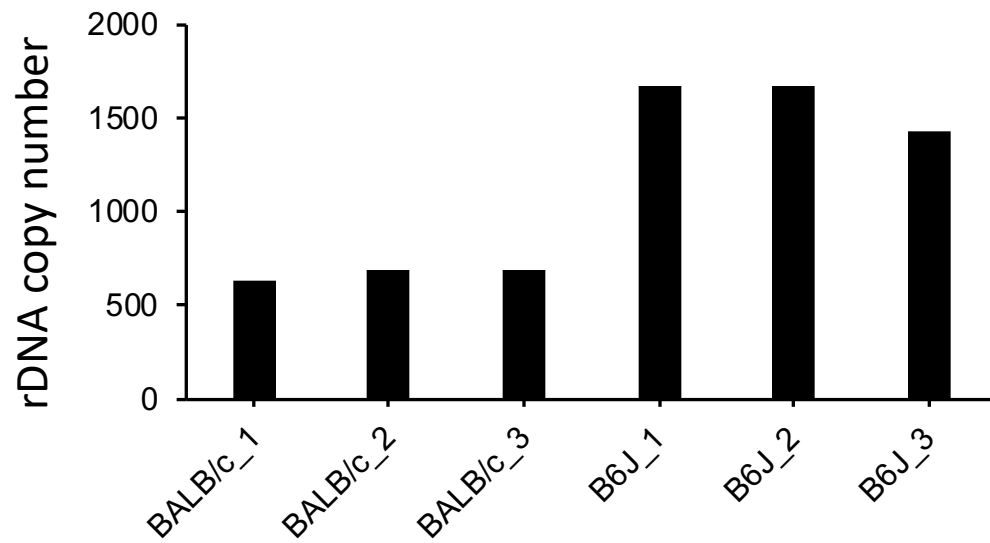

Figure S2 Estimated rDNA copy number from database



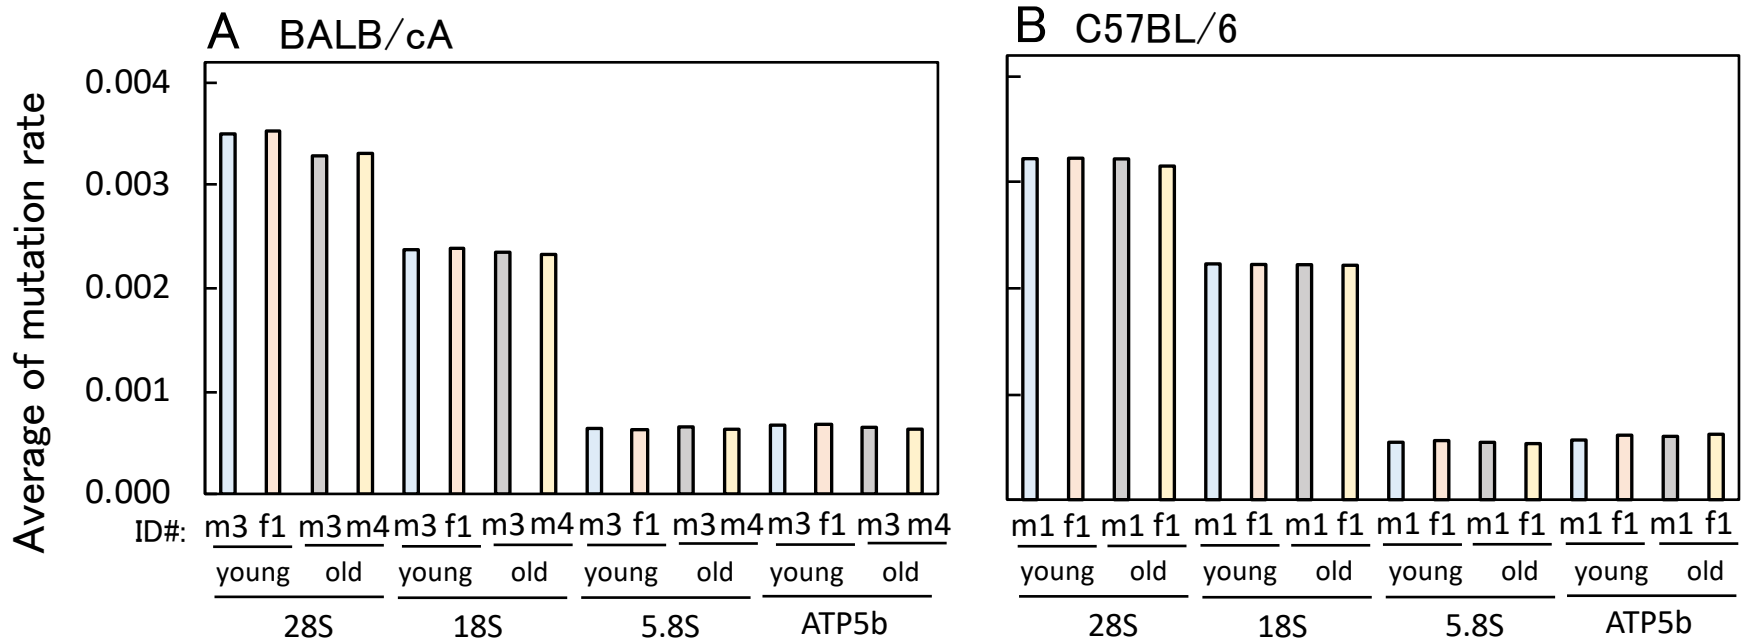

Figure S3 Mutation rates of young and old mice rDNA

# A 28S

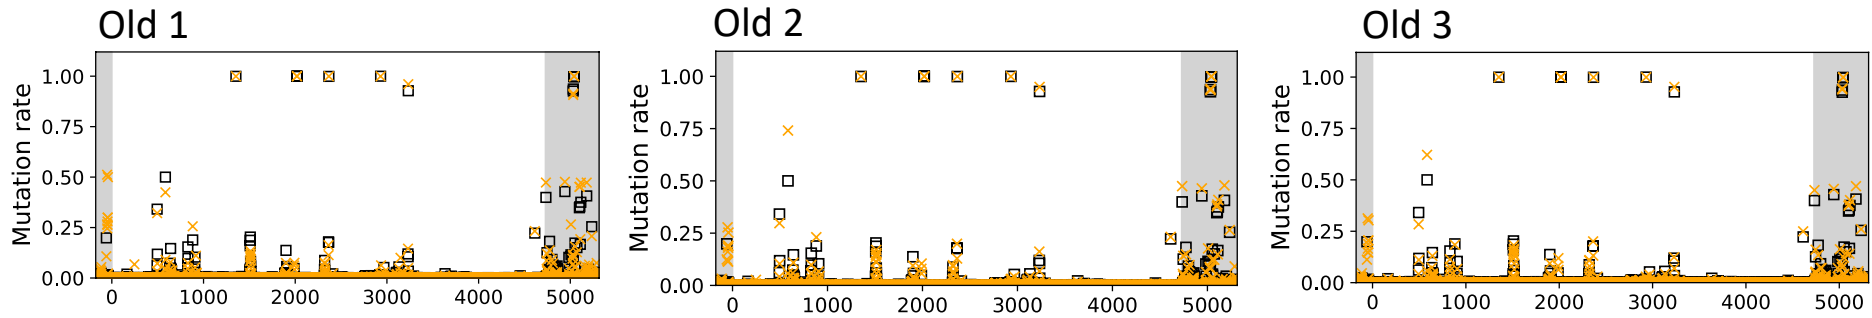

# B 18S

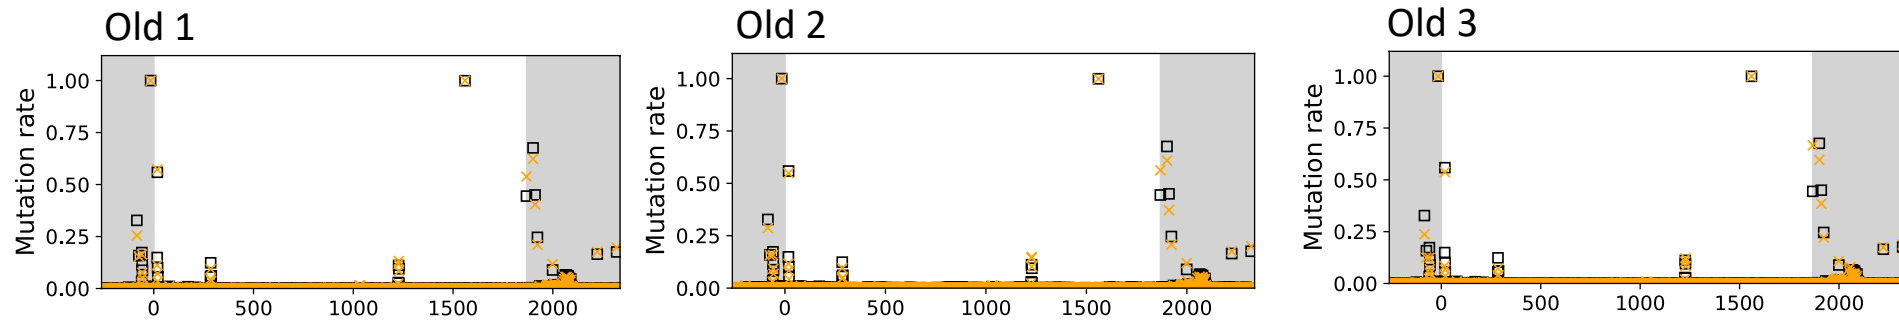

# C 5.8S

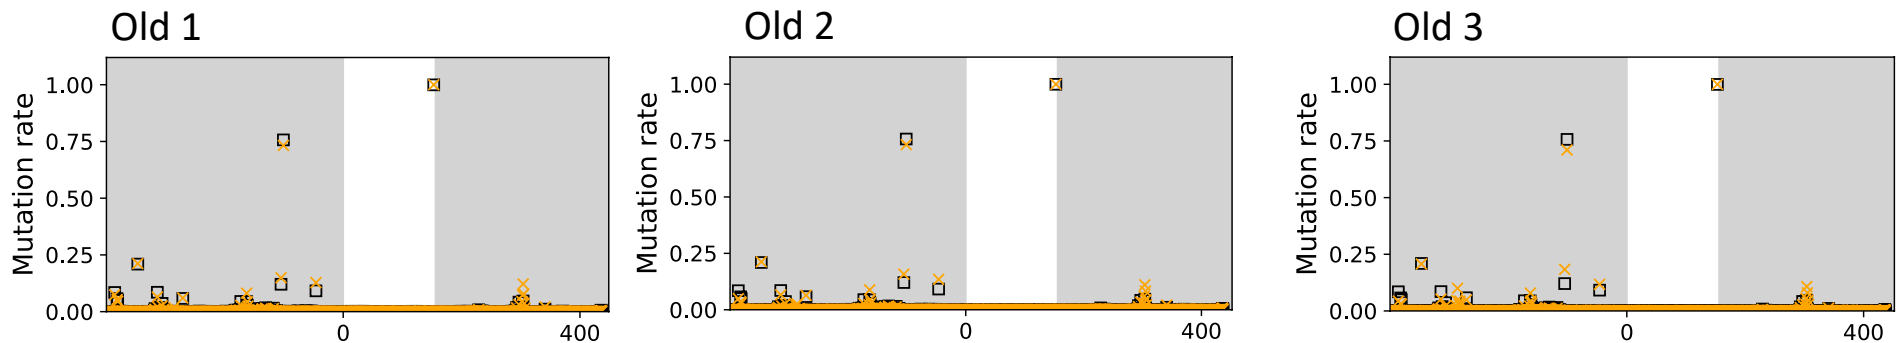

Figure S4 rDNA sequence variation in young and old C57BL/6 mice

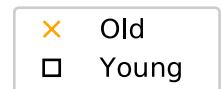

## D Young

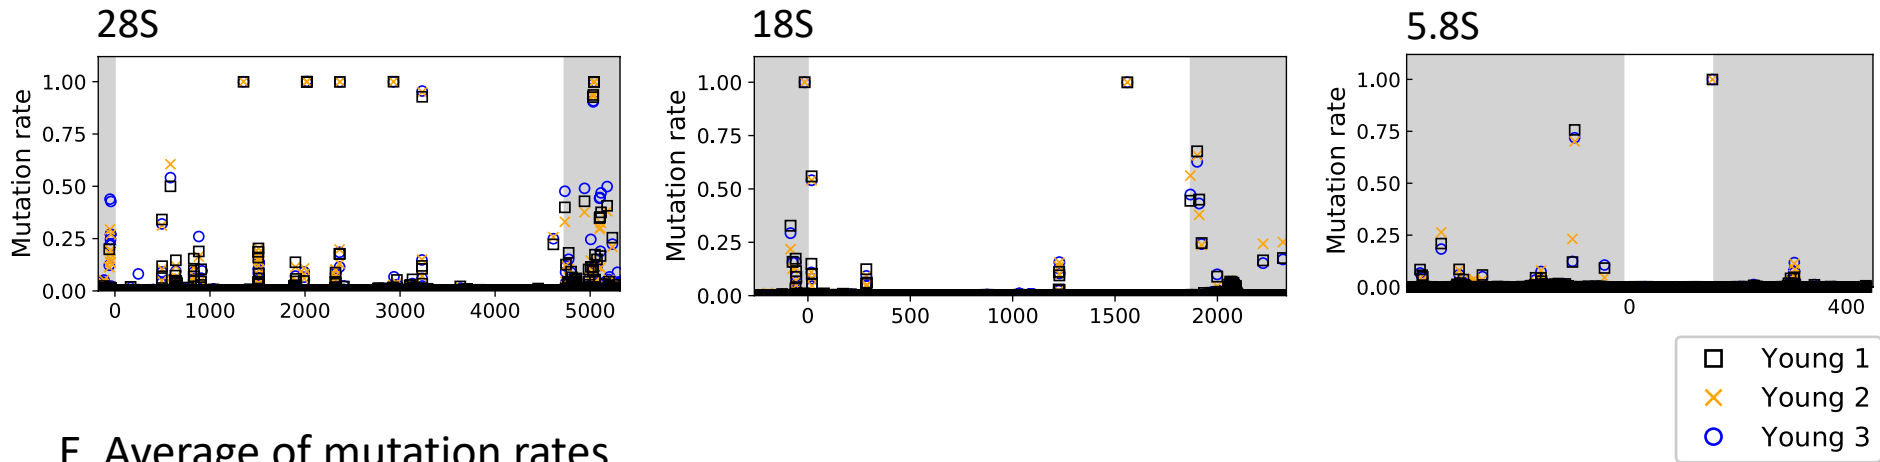

## E Average of mutation rates

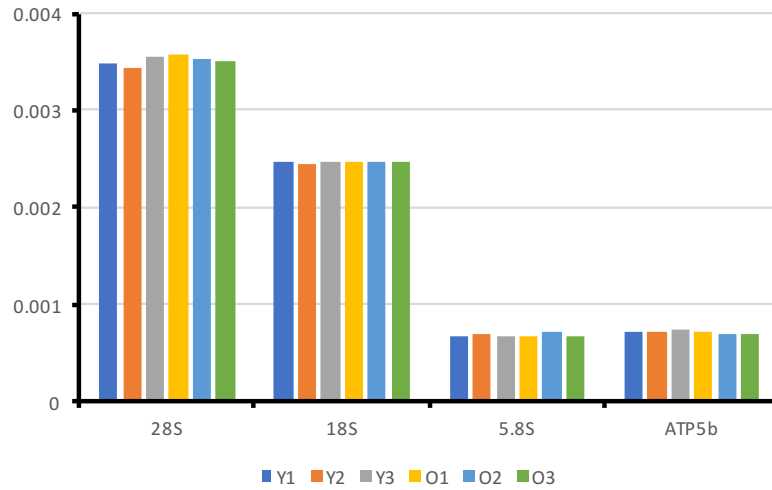

Figure S4. rDNA sequence variation in young and old C57BL/6 mice

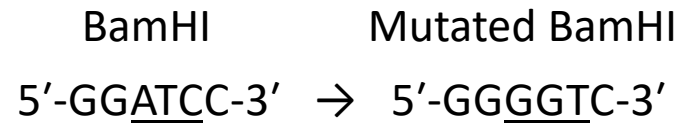

BALB/cA

| Position in 28S | Mutation rate |             |             |             |
|-----------------|---------------|-------------|-------------|-------------|
|                 | young         |             | old         |             |
|                 | male 3        | female 1    | male 3      | male 4      |
| G5050           | 0.00          | 0.00        | 0.00        | 0.00        |
| G5051           | 0.00          | 0.00        | 0.00        | 0.00        |
| A5052           | <b>0.23</b>   | <b>0.27</b> | <b>0.35</b> | <b>0.32</b> |
| T5053           | <b>0.00</b>   | <b>0.00</b> | <b>0.19</b> | <b>0.16</b> |
| C5054           | <b>0.00</b>   | <b>0.00</b> | <b>0.19</b> | <b>0.16</b> |
| C5055           | 0.00          | 0.00        | 0.00        | 0.00        |

Ave: 0.25

Ave: 0.685

C57BL/6

| Position in 28S | Mutation rate |             |             |             |
|-----------------|---------------|-------------|-------------|-------------|
|                 | young         |             | old         |             |
|                 | male 1        | female 1    | male 1      | female 1    |
| G5050           | 0.00          | 0.00        | 0.00        | 0.00        |
| G5051           | 0.00          | 0.00        | 0.00        | 0.00        |
| A5052           | <b>0.22</b>   | <b>0.25</b> | <b>0.21</b> | <b>0.21</b> |
| T5053           | <b>0.09</b>   | <b>0.11</b> | <b>0.09</b> | <b>0.08</b> |
| C5054           | <b>0.08</b>   | <b>0.11</b> | <b>0.09</b> | <b>0.08</b> |
| C5055           | 0.00          | 0.00        | 0.00        | 0.00        |

Ave: 0.44

Ave: 0.38

Table S1 Sequence variation at BamHI recognition sequences in young and old mice.

| Primer name      | Sequence (5' to 3')                   | Note                  |
|------------------|---------------------------------------|-----------------------|
| 28S_Fw           | tgggttttaagcaggaggtg                  | Figure 1, 3,<br>ddPCR |
| 28S_Rv           | gtgaattctgcttcacaatg                  | Figure 1,3            |
| 28S_ddPCR_Rv     | gacggtctaaaccagctca                   | ddPCR                 |
| probe_28S_Fw     | gttgccatgtaatcctgct                   | Figure 2, 4, 5        |
| probe_28S_Rv     | accagaagcaggtcgtcta                   | Figure 2, 4, 5        |
| probe_Swi5_Fw    | aggagttgattctctctacc                  | Figure 2, 5           |
| probe_Swi5_Rv    | gcatcaagacaattgtggtt                  | Figure 2, 5           |
| 45S_Fw           | ctcttagatcgatgtggtgctc                | Figure 3              |
| 45S_Rv           | gcccgtggcagaacgagaag                  | Figure 3              |
| Actb_Fw          | gacggccaggtcatcactattg                | Figure 3              |
| Actb_Rv          | agtttcatggatgccacagg                  | Figure 3              |
| GAPDH_Fw         | actcacggcaaattcaacgg                  | Figure 3              |
| GAPDH_Rv         | atgttagtggggtctcgtc                   | Figure 3              |
| B2M_Fw           | tacgtaacacagttccacc                   | Figure 3              |
| B2M_Rv           | tgctgaaggacatatctgac                  | Figure 3              |
| 18S_Seq_Fw       | taagagaggtgtcggagagc                  | Figure 6              |
| 18S_Seq_Rv       | cttctctcacctcactccag                  | Figure 6              |
| 5.8S_Seq_Fw      | gtcgttcccgtgttttccg                   | Figure 6              |
| 5.8S_Seq_Rv      | gaccgagaagactggtgag                   | Figure 6              |
| 28S_Seq_Fw       | ggttgcgtgtgagtaagatcctc               | Figure 6              |
| 28S_Seq_Rv       | tactggtcgacctccgaagttg                | Figure 6              |
| ATP5b_Seq_Fw     | gaataatggcggttctgtgcac                | Figure 6              |
| ATP5b_Seq_Rv     | atgattctgcccaaggtctcag                | Figure 6              |
| 28S_target_probe | 6FAM-gccgacatcgaaggatcaaaaagcgac-BHQ1 | ddPCR                 |

Table S2 Primer list
